# Supplementary material
Source: PubMed Central journal article supplement (PMC5003412)
Supplement: NIHMS810751-supplement-01.pdf [file NIHMS810751-supplement-01.pdf]

## Common Variants in the ATP2B1 Gene Are Associated With Susceptibility to Hypertension: The Japanese Millennium Genome Project

Yasuharu Tabara, Katsuhiko Kohara, Yoshikuni Kita, Nobuhito Hirawa, Tomohiro Katsuya, Takayoshi Ohkubo, Yumiko Hiura, Atsushi Tajima, Takayuki Morisaki, Toshiyuki Miyata, Tomohiro Nakayama, Naoyuki Takashima, Jun Nakura, Ryuichi Kawamoto, Norio Takahashi, Akira Hata, Masayoshi Soma, Yutaka Imai, Yoshihiro Kokubo, Tomonori Okamura, Hitonobu Tomoike, Naoharu Iwai, Toshio Ogihara, Itsuro Inoue, Katsushi Tokunaga, Toby Johnson, Mark Caulfield, Patricia Munroe on behalf of the Global Blood Pressure Genetics Consortium, Satoshi Umemura, Hirotsugu Ueshima and Tetsuro Miki

*Hypertension*. 2010;56:973-980; originally published online October 4, 2010;

doi: 10.1161/HYPERTENSIONAHA.110.153429

*Hypertension* is published by the American Heart Association, 7272 Greenville Avenue, Dallas, TX 75231

Copyright © 2010 American Heart Association, Inc. All rights reserved.

Print ISSN: 0194-911X. Online ISSN: 1524-4563

The online version of this article, along with updated information and services, is located on the World Wide Web at:

<http://hyper.ahajournals.org/content/56/5/973>

Data Supplement (unedited) at:

<http://hyper.ahajournals.org/content/suppl/2010/10/01/HYPERTENSIONAHA.110.153429.DC1.html>

**Permissions:** Requests for permissions to reproduce figures, tables, or portions of articles originally published in *Hypertension* can be obtained via RightsLink, a service of the Copyright Clearance Center, not the Editorial Office. Once the online version of the published article for which permission is being requested is located, click Request Permissions in the middle column of the Web page under Services. Further information about this process is available in the [Permissions and Rights Question and Answer](#) document.

**Reprints:** Information about reprints can be found online at:

<http://www.lww.com/reprints>

**Subscriptions:** Information about subscribing to *Hypertension* is online at:

<http://hyper.ahajournals.org/subscriptions/>

ONLINE SUPPLEMENT

**Common variants in the ATP2B1 gene are associated with  
susceptibility to hypertension  
The Japanese Millennium Genome Project**

Yasuharu Tabara, Katsuhiko Kohara, Yoshikuni Kita, Nobuhito Hirawa,  
Tomohiro Katsuya, Takayoshi Ohkubo, Yumiko Hiura, Atsushi Tajima,  
Takayuki Morisaki, Toshiyuki Miyata, Tomohiro Nakayama, Naoyuki Takashima,  
Jun Nakura, Ryuichi Kawamoto, Norio Takahashi, Akira Hata, Masayoshi Soma,  
Yutaka Imai, Yoshihiro Kokubo, Tomonori Okamura, Hitonobu Tomoike, Naoharu Iwai,  
Toshio Ogihara, Itsuro Inoue, Katsushi Tokunaga, Toby Johnson, Mark Caulfield,  
Patricia Munroe, on behalf of the Global BPgen consortium\*, Satoshi Umemura,  
Hirotugu Ueshima, and Tetsuro Miki.

**Correspondence to**

Yasuharu Tabara Ph.D.

Department of Basic Medical Research and Education,  
Ehime University Graduate School of Medicine.

Shitsukawa 454, Toon-City,

Ehime 791-0295, Japan.

TEL: +81-89-960-5278

FAX: +81-89-960-5279

e-mail: tabara@m.ehime-u.ac.jp

## SUPPLEMENTAL METHODS

### *ex vivo expression analysis of ATP2B1 mRNA*

We obtained 34 umbilical cords at delivery (Kosei General Hospital). Umbilical arteries were excised from the cords and cut into small pieces. Umbilical artery smooth muscle cells (UASMCs) were separated using Hanks buffer containing 2 mg/ml collagenase and cultured in HuMedia-SG (Kurabo, Osaka, Japan) supplemented with epithelial growth factor (0.5 ng/ml), basic fibroblast growth factor (2 ng/ml), insulin (5 µg/ml), antibiotics and 5% fetal bovine serum. Total RNAs was extracted from UASMCs during early passages using TRIzol reagent according to manufacturer's instructions (Invitrogen, Carlsbad, CA). First-strand cDNA was synthesized from 500 ng of the total RNA using a PrimeScript 1st strand cDNA Synthesis Kit (Takara Bio, Shiga, Japan), and then diluted five times for subsequent real-time PCR (RT-PCR). RT-PCR was performed using TaqMan Gene Expression Assays on a 7900HT Sequence Detection System (Applied Biosystems). A relative quantification method [1] was used to measure the amounts of ATP2B1 (TaqMan assay ID, Hs00155949\_m1) with glyceraldehyde-3-phosphate dehydrogenase (GAPDH) (Hs99999905\_m1) as an internal control. Genotype of ATP2B1 rs11105378 of each sample was analyzed by direct sequencing (BigDye Terminator v3.1 Cycle Sequencing Kit on a 3730xl GeneticAnalyzer, Applied Biosystems) using isolated genomic DNA from UASMCs (QIAamp DNA Mini Kit, QIAGEN GmbH, Hilden, Germany). The direct sequencing was performed with the following primers; forward 5'-TTCATAGCCCTTTTCATCTCTTTC-3', reverse 5'-AGAATCTCGGGAAAACAGCA-3'.

**Table S1 Clinical characteristics of the cohort-based population sample**

| Parameters                           | Total<br>(14,105) | Community-based general population |                      |                      |                  |                   | Company employee    |                    |
|--------------------------------------|-------------------|------------------------------------|----------------------|----------------------|------------------|-------------------|---------------------|--------------------|
|                                      |                   | Ohasama<br>(1,592)                 | Shigaraki<br>(2,273) | Takashima<br>(1,730) | Suita<br>(2,536) | Nomura<br>(2,876) | Yokohama<br>(2,290) | Matsuyama<br>(808) |
| Age (years)                          | 57.8±14.0         | 57.5±11.2                          | 57.2±15.5            | 59.7±14.1            | 65.6±10.9        | 61.1±14.0         | 45.7±10.2           | 54.2±5.8           |
| Sex (male/female)                    | 6931/7174         | 601/991                            | 862/1411             | 633/1097             | 1160/1376        | 1247/1629         | 1659/631            | 769/39             |
| Body mass index (kg/m <sup>2</sup> ) | 23.0±3.1          | 23.7±3.2                           | 22.6±3.1             | 22.9±3.0             | 22.9±3.1         | 23.4±3.2          | 22.4±3.1            | 23.4±2.9           |
| History of CVD                       | 7.1               | 11.9                               | 12.1                 | 4.0                  | 7.5              | 8.1               | 0.4                 | 4.3                |
| Systolic BP (mmHg)                   | 130.1±19.6        | 131.7±14.2                         | 130.1±19.5           | 130.6±21.3           | 124.5±18.9       | 137.7±22.1        | 123.8±14.9          | 134.3±19.1         |
| Diastolic BP (mmHg)                  | 77.9±11.5         | 74.4±9.4                           | 76.7±11.7            | 76.8±12.0            | 75.6±10.5        | 81.0±11.8         | 78.3±10.3           | 85.1±12.2          |
| Hypertension (%)                     | 40.7              | 43.2                               | 44.4                 | 39.5                 | 38.2             | 53.3              | 22.9                | 46.2               |
| Antihypertensive treatment (%)       | 20.5              | 26.5                               | 23.5                 | 16.4                 | 26.4             | 25.7              | 6.5                 | 12.4               |

Values are mean±SD. Cardiovascular disease (CVD); stroke, myocardial infarction, and angina pectoris. Hypertension; any or all of systolic blood pressure more than 140 mmHg, diastolic blood pressure more than 90 mmHg, and current use of antihypertensive agents. The Ohasama study conducted by Tohoku University is a population-based longitudinal epidemiological study focusing on the clinical implications of home BP measurement [2]. Ohasama Town is a rural community located in the northern part of Japan (Iwate Prefecture). Subjects were recruited through a community-based annual medical check-up process. The Shigaraki [3] and Takashima [4] studies of Shiga University of Medical Science are general population-based longitudinal studies. Both towns are located in central Japan (Shiga Prefecture). Subjects were recruited through a community-based annual medical check-up process. The Suita study conducted by the National Cardiovascular Center is based on the residents of Suita city, an urban city located in the second largest area Osaka, Japan [5]. Subjects were recruited through a biennial medical check-up process of the National Cardiovascular Center. The Nomura study of Ehime University is a longitudinal epidemiological study based on the Nomura Town residents, a largely rural community located in Ehime Prefecture [6]. Subjects were recruited through a community-based annual medical check-up process. The Yokohama (Yokohama City University) and Matsuyama (Ehime University) cohorts are derived from employees of large manufacturing industries located in Kanagawa and Matuyama City, Ehime Prefecture (western part of Japan) [7] respectively. In all cohorts, clinical parameters were obtained from personal health records during the annual or biennial medical check-up process. All study procedures were approved by the ethics committee of each University or Institution. Singed informed consent was obtained from all participating subjects.

**Table S2 Clinical characteristics of the replication panel**

| Parameters                           | Hypertensive cases<br>(1,929) | Normotensive controls<br>(1,993) | p      |
|--------------------------------------|-------------------------------|----------------------------------|--------|
| Age (years)                          | 55.1±7.1                      | 55.2±9.5                         | 0.680  |
| Sex (male/female)                    | 1,200/729                     | 829/1,164                        | <0.001 |
| Body mass index (kg/m <sup>2</sup> ) | 24.4±3.1                      | 21.9±2.7                         | <0.001 |
| History of CVD (%)                   | 5.4                           | 0                                | <0.001 |
| Systolic blood pressure (mmHg)       | 146.3±15.9                    | 109.5±7.5                        | <0.001 |
| Diastolic blood pressure (mmHg)      | 91.0±10.1                     | 67.7±6.5                         | <0.001 |
| Antihypertensive treatment (%)       | 47.5                          | 0                                | <0.001 |

Values are mean±SD. Nested hypertensive cases and normotensive control subjects were chosen from the cohort-based population sample according to the following criteria: hypertensive subjects aged 64 years or younger, and were either being treated with antihypertensive medication or had a SBP more than 160 mmHg and/or DBP more than 90 mmHg; normotensive subjects aged 40 years or older, and all of SBP less than 120 mmHg, and DBP less than 80 mmHg, no current use of antihypertensive medication, and free from any history of cardiovascular disease. Cardiovascular disease (CVD) includes stroke, myocardial infarction, and angina pectoris.

**Table S3 Association of 36 candidate SNPs with hypertension (replication panel)**

| Gene     | SNP (position) | Genotype | Screening Panel    |     |     |     |           |         | Odds ratio (p-value)         |                |                |                |
|----------|----------------|----------|--------------------|-----|-----|-----|-----------|---------|------------------------------|----------------|----------------|----------------|
|          |                |          | Genotype frequency |     |     | HWE | Call rate | Allelic | Recessive                    | Dominant       | Additive       |                |
| ACCN1    | rs28933        | AA/GA/GG | HT                 | 464 | 974 | 449 | 0.159     | 97.6    | 1.03                         | 1.07           | 1.02           | (0.686)        |
|          |                |          | NT                 | 469 | 986 | 485 | 0.466     |         | (0.479)                      | (0.385)        | (0.766)        |                |
| ADORA1   | rs3766554      | AA/GA/GG | HT                 | 424 | 923 | 557 | 0.262     | 98.6    | 1.03                         | 1.00           | 1.09           | (0.523)        |
|          |                |          | NT                 | 410 | 981 | 574 | 0.808     |         | (0.548)                      | (0.977)        | (0.289)        |                |
| ATP10A   | rs3736186      | GG/AG/AA | HT                 | 791 | 868 | 263 | 0.312     | 99.4    | <b>1.10</b>                  | 1.04           | <b>1.18</b>    | <b>(0.033)</b> |
|          |                |          | NT                 | 734 | 963 | 280 | 0.206     |         | <b>(0.040)</b>               | (0.666)        | <b>(0.010)</b> |                |
| ATP10D   | rs1058793      | AA/GA/GG | HT                 | 675 | 894 | 325 | 0.326     | 98.2    | 1.07                         | 1.17           | 1.04           | (0.169)        |
|          |                |          | NT                 | 680 | 896 | 382 | 0.005     |         | (0.147)                      | (0.060)        | (0.555)        |                |
| ATP2A3   | rs887387       | TT/TC/CC | HT                 | 936 | 775 | 189 | 0.126     | 98.7    | 1.05                         | 1.02           | 1.07           | (0.527)        |
|          |                |          | NT                 | 936 | 836 | 200 | 0.508     |         | (0.342)                      | (0.840)        | (0.263)        |                |
| ATP2B1   | rs2070759      | GG/GT/TT | HT                 | 582 | 896 | 399 | 0.118     | 97.2    | <b>1.18</b>                  | <b>1.2</b>     | <b>1.27</b>    | <b>(0.002)</b> |
|          |                |          | NT                 | 507 | 956 | 474 | 0.579     |         | <b>(4.0*10<sup>-4</sup>)</b> | <b>(0.018)</b> | <b>(0.001)</b> |                |
| CACNA1E  | rs2293990      | AA/TA/TT | HT                 | 568 | 911 | 412 | 0.194     | 98.2    | 1.03                         | 1.07           | 1.01           | (0.661)        |
|          |                |          | NT                 | 585 | 926 | 451 | 0.022     |         | (0.532)                      | (0.372)        | (0.881)        |                |
| CACNA2D2 | rs2236957      | GG/GA/AA | HT                 | 459 | 925 | 496 | 0.499     | 97.3    | 1.00                         | 1.00           | 1.01           | (0.997)        |
|          |                |          | NT                 | 471 | 954 | 512 | 0.523     |         | (0.948)                      | (0.972)        | (0.943)        |                |
| CAST     | rs967591       | AA/AG/GG | HT                 | 442 | 916 | 552 | 0.100     | 99.1    | 1.00                         | 0.98           | 1.02           | (0.875)        |
|          |                |          | NT                 | 451 | 964 | 561 | 0.345     |         | (0.932)                      | (0.725)        | (0.814)        |                |
| CHGA     | rs3759717      | CC/TC/TT | HT                 | 744 | 877 | 288 | 0.263     | 99.1    | 1.00                         | 0.93           | 1.04           | (0.522)        |
|          |                |          | NT                 | 755 | 943 | 281 | 0.624     |         | (0.977)                      | (0.434)        | (0.598)        |                |
| COL4A1   | rs2305080      | GG/GA/AA | HT                 | 485 | 908 | 523 | 0.023     | 99.2    | 1.02                         | 0.97           | 1.07           | (0.468)        |
|          |                |          | NT                 | 473 | 972 | 528 | 0.536     |         | (0.723)                      | (0.707)        | (0.332)        |                |

**Table S3 Continued**

| Gene    | SNP<br>(position) | Genotype |    | Screening Panel    |     |     |       |           | Odds ratio (p-value) |                |          |          |
|---------|-------------------|----------|----|--------------------|-----|-----|-------|-----------|----------------------|----------------|----------|----------|
|         |                   |          |    | Genotype frequency |     |     | HWE   | Call rate | Allelic              | Recessive      | Dominant | Additive |
| DLGAP2  | rs2301963         | CC/CA/AA | HT | 510                | 904 | 493 | 0.024 | 98.6      | 1.05                 | 1.07           | 1.08     | (0.516)  |
|         |                   |          | NT | 497                | 932 | 532 | 0.029 |           | (0.239)              | (0.368)        | (0.321)  |          |
| ERCC1   | rs2298881         | CC/CA/AA | HT | 595                | 899 | 387 | 0.161 | 97.5      | 1.00                 | 0.96           | 1.04     | (0.702)  |
|         |                   |          | NT | 600                | 955 | 388 | 0.821 |           | (0.948)              | (0.642)        | (0.616)  |          |
| EXOSC3  | rs7158            | AA/AG/GG | HT | 511                | 967 | 418 | 0.327 | 97.9      | 1.01                 | 1.09           | 0.95     | (0.262)  |
|         |                   |          | NT | 545                | 941 | 458 | 0.187 |           | (0.850)              | (0.264)        | (0.452)  |          |
| FGF2    | rs3747676         | GG/GA/AA | HT | 415                | 937 | 519 | 0.839 | 96.4      | 1.01                 | 1.07           | 0.94     | (0.309)  |
|         |                   |          | NT | 444                | 908 | 556 | 0.050 |           | (0.892)              | (0.340)        | (0.424)  |          |
| GIPC1   | rs3815715         | GG/GA/AA | HT | 734                | 863 | 309 | 0.040 | 98.8      | 1.03                 | 0.98           | 1.07     | (0.510)  |
|         |                   |          | NT | 728                | 927 | 313 | 0.532 |           | (0.585)              | (0.794)        | (0.330)  |          |
| GNA14   | rs1801258         | TT/TC/CC | HT | 317                | 919 | 675 | 0.888 | 99.0      | 1.05                 | 1.11           | 0.90     | (0.249)  |
|         |                   |          | NT | 330                | 899 | 743 | 0.039 |           | (0.321)              | (0.128)        | (0.903)  |          |
| GNAI2   | rs2236943         | GG/GA/AA | HT | 556                | 912 | 429 | 0.137 | 97.9      | 1.04                 | 1.02           | 1.07     | (0.640)  |
|         |                   |          | NT | 543                | 953 | 448 | 0.448 |           | (0.427)              | (0.751)        | (0.345)  |          |
| GUCA1C  | rs2715709         | AA/GA/GG | HT | 225                | 886 | 767 | 0.204 | 97.1      | 1.06                 | 1.12           | 0.98     | (0.156)  |
|         |                   |          | NT | 236                | 853 | 843 | 0.373 |           | (0.242)              | (0.081)        | (0.824)  |          |
| HCN4    | rs3743496         | GG/TG/TT | HT | 431                | 877 | 594 | 0.002 | 98.2      | 1.01                 | 0.94           | 1.11     | (0.150)  |
|         |                   |          | NT | 408                | 959 | 583 | 0.710 |           | (0.859)              | (0.369)        | (0.192)  |          |
| HLA-DMB | rs2071556         | CC/CA/AA | HT | 511                | 932 | 450 | 0.534 | 98.0      | 1.09                 | <b>1.17</b>    | 1.07     | (0.105)  |
|         |                   |          | NT | 500                | 928 | 521 | 0.036 |           | (0.060)              | <b>(0.035)</b> | (0.346)  |          |
| KCNIP2  | rs755381          | TT/TC/CC | HT | 453                | 904 | 543 | 0.044 | 98.2      | 1.05                 | 1.03           | 1.12     | (0.311)  |
|         |                   |          | NT | 425                | 957 | 569 | 0.548 |           | (0.245)              | (0.688)        | (0.128)  |          |

**Table S3 Continued**

| Gene    | SNP<br>(position) | Genotype | Screening Panel    |      |     |     |           |         | Odds ratio (p-value) |                |          |                |
|---------|-------------------|----------|--------------------|------|-----|-----|-----------|---------|----------------------|----------------|----------|----------------|
|         |                   |          | Genotype frequency |      |     | HWE | Call rate | Allelic | Recessive            | Dominant       | Additive |                |
| KCNMB4  | rs710652          | CC/AC/AA | HT                 | 660  | 953 | 298 | 0.131     | 99.2    | 1.09                 | <b>1.28</b>    | 1.03     | <b>(0.012)</b> |
|         |                   |          | NT                 | 669  | 930 | 379 | 0.083     |         | (0.056)              | <b>(0.003)</b> | (0.638)  |                |
| KCNN1   | rs2278993         | TT/TC/CC | HT                 | 189  | 805 | 919 | 0.513     | 99.2    | 1.07                 | 1.08           | 1.15     | (0.335)        |
|         |                   |          | NT                 | 172  | 819 | 985 | 0.924     |         | (0.152)              | (0.259)        | (0.207)  |                |
| PPP1R1B | rs3764352         | TT/TC/CC | HT                 | 547  | 940 | 374 | 0.412     | 96.0    | 1.07                 | 1.16           | 1.04     | (0.165)        |
|         |                   |          | NT                 | 546  | 928 | 431 | 0.333     |         | (0.156)              | (0.059)        | (0.621)  |                |
| PTHR1   | rs1138518         | TT/TC/CC | HT                 | 381  | 931 | 595 | 0.626     | 98.5    | 1.01                 | 1.04           | 0.98     | (0.803)        |
|         |                   |          | NT                 | 396  | 935 | 626 | 0.169     |         | (0.814)              | (0.599)        | (0.843)  |                |
| PTPRT   | rs3746539         | AA/AG/GG | HT                 | 495  | 991 | 430 | 0.119     | 99.1    | 1.04                 | 1.12           | 0.99     | (0.262)        |
|         |                   |          | NT                 | 514  | 975 | 482 | 0.644     |         | (0.435)              | (0.139)        | (0.863)  |                |
| RAC2    | rs929023          | TT/TC/CC | HT                 | 387  | 921 | 588 | 0.448     | 98.2    | 1.06                 | 1.06           | 1.12     | (0.373)        |
|         |                   |          | NT                 | 365  | 961 | 629 | 0.951     |         | (0.200)              | (0.438)        | (0.173)  |                |
| RGS2    | rs3767489         | AA/GA/GG | HT                 | 635  | 892 | 370 | 0.075     | 98.0    | 1.03                 | 0.94           | 1.12     | (0.104)        |
|         |                   |          | NT                 | 603  | 981 | 362 | 0.291     |         | (0.483)              | (0.476)        | (0.099)  |                |
| RGS20   | rs3816772         | CC/CG/GG | HT                 | 268  | 924 | 695 | 0.162     | 97.6    | 1.03                 | 1.11           | 0.92     | (0.112)        |
|         |                   |          | NT                 | 295  | 884 | 760 | 0.152     |         | (0.543)              | (0.132)        | (0.377)  |                |
| SLC13A1 | rs2140516         | GG/GA/AA | HT                 | 341  | 917 | 662 | 0.448     | 99.4    | 1.06                 | 1.11           | 1.03     | (0.322)        |
|         |                   |          | NT                 | 343  | 907 | 727 | 0.039     |         | (0.225)              | (0.135)        | (0.736)  |                |
| SLC22A7 | rs2270860         | AA/GA/GG | HT                 | 233  | 868 | 788 | 0.800     | 97.8    | <b>1.1</b>           | <b>1.15</b>    | 1.09     | (0.100)        |
|         |                   |          | NT                 | 223  | 844 | 878 | 0.352     |         | <b>(0.048)</b>       | <b>(0.032)</b> | (0.406)  |                |
| SLC26A8 | rs2295852         | TT/TC/CC | HT                 | 994  | 747 | 154 | 0.413     | 97.6    | 1.01                 | 0.97           | 1.03     | (0.857)        |
|         |                   |          | NT                 | 1002 | 779 | 153 | 0.926     |         | (0.835)              | (0.806)        | (0.690)  |                |



**Table S3 Continued**

| Gene    | SNP<br>(position) | Genotype |    | Screening Panel    |     |     |       |           | Odds ratio (p-value) |           |          |          |
|---------|-------------------|----------|----|--------------------|-----|-----|-------|-----------|----------------------|-----------|----------|----------|
|         |                   |          |    | Genotype frequency |     |     | HWE   | Call rate | Allelic              | Recessive | Dominant | Additive |
| SLC2A11 | rs2236620         | AA/AG/GG | HT | 308                | 890 | 715 | 0.266 | 99.0      | 1.04                 | 1.00      | 1.16     | (0.211)  |
|         |                   |          | NT | 279                | 953 | 738 | 0.306 |           | (0.360)              | (0.956)   | (0.092)  |          |
| SLCO1B1 | rs2291075         | GG/GA/AA | HT | 719                | 868 | 319 | 0.039 | 98.7      | 1.01                 | 0.95      | 1.05     | (0.493)  |
|         |                   |          | NT | 719                | 932 | 314 | 0.680 |           | (0.866)              | (0.524)   | (0.466)  |          |
| WNK1    | rs2255390         | GG/GA/AA | HT | 490                | 925 | 475 | 0.359 | 97.4      | 1.07                 | 1.09      | 1.10     | (0.339)  |
|         |                   |          | NT | 466                | 949 | 516 | 0.470 |           | (0.139)              | (0.262)   | (0.201)  |          |

The replication panel consists of 1,929 hypertensive cases and 1,993 normotensives controls selected from a 11,569 cohort sample (Table S2).

**Table S4 Clinical characteristics of the screening panel**

| Parameters                           | Hypertensive cases<br>(758) | Normotensive controls<br>(726) |
|--------------------------------------|-----------------------------|--------------------------------|
| Male (n (%))                         | 564 (74.4)                  | 550 (75.8)                     |
| Age (years)                          | 59.0±11.0                   | 62.8±9.4                       |
| Body mass index (kg/m <sup>2</sup> ) | 23.6±3.0                    | 22.7±2.9                       |
| Systolic BP (mmHg)                   | 163.5±24.6                  | 115.9±12.0                     |
| Diastolic BP (mmHg)                  | 100.3±15.7                  | 72.0±7.6                       |
| Antihypertensive medication (n (%))  | 499 (65.8)                  | -                              |

Values are mean±standard deviation. Hypertensive cases: non-obese hypertensive patients, who had a previous diagnosis of hypertension at between 30 and 59 years of age, were either being treated with antihypertensive medication or had a SBP more than 160 mmHg and/or DBP more than 100 mmHg, had a family history of hypertension in their parents and/or siblings. Normotensive controls: middle-aged to elderly subjects (aged more than 45 years), who had never been treated with antihypertensive medications, had a SBP less than 120 mmHg and DBP less than 80 mmHg, and had no family history of hypertension.

**Table S5 Dense SNP analysis of the *ATP2B1* gene (screening panel)**

| Gene   | SNP<br>(position)        | Genotype | Screening Panel    |     |     |     |           |         | Odds ratio (p-value) |          |          |         |
|--------|--------------------------|----------|--------------------|-----|-----|-----|-----------|---------|----------------------|----------|----------|---------|
|        |                          |          | Genotype frequency |     |     | HWE | Call rate | Allelic | Recessive            | Dominant | Additive |         |
| ATP2B1 | rs3920010<br>(88464519)  | GG/GA/AA | HT                 | 17  | 191 | 542 | 0.971     | 97.9    | 0.95                 | 0.72     | 0.97     | (0.596) |
|        |                          |          | NT                 | 22  | 177 | 504 | 0.187     |         | (0.591)              | (0.311)  | (0.808)  |         |
|        | rs3900133<br>(88512561)  | CC/CA/AA | HT                 |     |     |     |           | NF      |                      |          |          |         |
|        |                          |          | NT                 |     |     |     |           |         |                      |          |          |         |
|        | rs1401982<br>(88513730)  | AA/AG/GG | HT                 | 318 | 328 | 92  | 0.603     | 96.3    | 1.28                 | 1.34     | 1.45     | (0.006) |
|        |                          |          | NT                 | 249 | 324 | 118 | 0.474     |         | (0.001)              | (0.007)  | (0.014)  |         |
|        | rs988111<br>(88515650)   | TT/TC/CC | HT                 |     |     |     |           | NF      |                      |          |          |         |
|        |                          |          | NT                 |     |     |     |           |         |                      |          |          |         |
|        | rs10858912<br>(88515998) | GG/GA/AA | HT                 |     |     |     |           | NF      |                      |          |          |         |
|        |                          |          | NT                 |     |     |     |           |         |                      |          |          |         |
|        | rs4516026<br>(88518251)  | TT/TG/GG | HT                 |     |     |     |           | NF      |                      |          |          |         |
|        |                          |          | NT                 |     |     |     |           |         |                      |          |          |         |
|        | rs2854371<br>(88519597)  | GG/GA/AA | HT                 | 23  | 208 | 520 | 0.692     | 98.7    | 1.32                 | 1.38     | 1.37     | (0.028) |
|        |                          |          | NT                 | 16  | 159 | 538 | 0.300     |         | (0.008)              | (0.333)  | (0.008)  |         |
|        | rs1520184<br>(88520698)  | GG/GA/AA | HT                 |     |     |     |           | NF      |                      |          |          |         |
|        |                          |          | NT                 |     |     |     |           |         |                      |          |          |         |
|        | rs1356819<br>(88524892)  | AA/AC/CC | HT                 | 743 | 5   | 0   | 0.927     | 98.6    | 1.26                 | 1.26     |          |         |
|        |                          |          | NT                 | 709 | 6   | 0   | 0.910     |         | (0.707)              | (0.706)  |          |         |
|        | rs957525<br>(88524946)   | TT/TC/CC | HT                 | 414 | 264 | 62  | 0.034     | 97.6    | 1.05                 | 1.11     | 0.90     | (0.389) |
|        |                          |          | NT                 | 377 | 277 | 54  | 0.753     |         | (0.554)              | (0.303)  | (0.599)  |         |
|        | rs17017109<br>(88528238) | TT/TG/GG | HT                 | 591 | 144 | 7   | 0.586     | 97.8    | 0.81                 | 0.79     | 0.89     | (0.211) |
|        |                          |          | NT                 | 591 | 113 | 6   | 0.816     |         | (0.094)              | (0.079)  | (0.842)  |         |

**Table S5 Continued**

| Gene                    | SNP<br>(position)        | Genotype |    | Screening Panel    |     |     |       |           | Odds ratio (p-value) |           |          |          |  |
|-------------------------|--------------------------|----------|----|--------------------|-----|-----|-------|-----------|----------------------|-----------|----------|----------|--|
|                         |                          |          |    | Genotype frequency |     |     | HWE   | Call rate | Allelic              | Recessive | Dominant | Additive |  |
| ATP2B1                  | rs1520183<br>(88532742)  | CC/CT/TT | HT |                    |     |     |       |           |                      |           |          |          |  |
|                         |                          |          | NT |                    |     |     |       |           |                      |           |          |          |  |
|                         | rs2681472<br>(88533090)  | GG/GA/AA | HT | 90                 | 321 | 335 | 0.334 | 97.8      | 0.79                 | 0.74      | 0.75     | (0.012)  |  |
|                         |                          |          | NT | 111                | 328 | 267 | 0.539 |           | (0.003)              | (0.044)   | (0.006)  |          |  |
|                         | rs11614886<br>(88535251) | GG/GC/CC | HT |                    |     |     |       |           |                      |           |          |          |  |
|                         |                          |          | NT |                    |     |     |       |           |                      |           |          |          |  |
|                         | rs2070759<br>(88541867)  | GG/GT/TT | HT | 216                | 379 | 151 | 0.515 | 97.6      | 1.15                 | 1.13      | 1.31     | (0.096)  |  |
|                         |                          |          | NT | 186                | 341 | 175 | 0.454 |           | (0.054)              | (0.297)   | (0.033)  |          |  |
|                         | rs2070758<br>(88545352)  | AA/AC/CC | HT | 638                | 103 | 10  | 0.016 | 98.4      | 1.23                 | 1.32      | 0.63     | (0.056)  |  |
|                         |                          |          | NT | 575                | 128 | 6   | 0.701 |           | (0.113)              | (0.050)   | (0.377)  |          |  |
|                         | rs1050395<br>(88553032)  | TT/TC/CC | HT | 730                | 17  | 0   | 0.753 | 97.9      | 1.38                 | 1.32      |          | (0.468)  |  |
|                         |                          |          | NT | 685                | 20  | 1   | 0.042 |           | (0.327)              | (0.406)   |          |          |  |
|                         | rs1050396<br>(88553110)  | CC/CA/AA | HT |                    |     |     |       |           |                      |           |          |          |  |
|                         |                          |          | NT |                    |     |     |       |           |                      |           |          |          |  |
|                         | rs2056327<br>(88562685)  | CC/CT/TT | HT |                    |     |     |       |           |                      |           |          |          |  |
|                         |                          |          | NT |                    |     |     |       |           |                      |           |          |          |  |
|                         | rs939329<br>(88564015)   | AA/AG/GG | HT | 196                | 382 | 168 | 0.485 | 97.4      | 1.08                 | 1.04      | 1.18     | (0.422)  |  |
|                         |                          |          | NT | 178                | 343 | 178 | 0.623 |           | (0.313)              | (0.726)   | (0.190)  |          |  |
| rs7975689<br>(88571125) | AA/AG/GG                 | HT       |    |                    |     |     |       |           |                      |           |          |          |  |
|                         |                          | NT       |    |                    |     |     |       |           |                      |           |          |          |  |
| rs7138016<br>(88572551) | TT/TA/AA                 | HT       |    |                    |     |     |       |           |                      |           |          |          |  |
|                         |                          | NT       |    |                    |     |     |       |           |                      |           |          |          |  |

**Table S5 Continued**

| Gene   | SNP<br>(position)        | Genotype |    | Screening Panel    |     |     |       |           | Odds ratio (p-value)    |           |                         |                         |
|--------|--------------------------|----------|----|--------------------|-----|-----|-------|-----------|-------------------------|-----------|-------------------------|-------------------------|
|        |                          |          |    | Genotype frequency |     |     | HWE   | Call rate | Allelic                 | Recessive | Dominant                | Additive                |
| ATP2B1 | rs12579302<br>(88574634) | GG/GA/AA | HT | 105                | 310 | 333 | 0.018 | 98.9      | 0.80                    | 0.76      | 0.76                    | (0.023)                 |
|        |                          |          | NT | 127                | 319 | 273 | 0.046 |           | (0.004)                 | (0.058)   | (0.011)                 |                         |
|        | rs11105359<br>(88575212) | TT/TG/GG | HT |                    |     |     |       | NF        |                         |           |                         |                         |
|        |                          |          | NT |                    |     |     |       |           |                         |           |                         |                         |
|        | rs11105360<br>(88575303) | TT/TC/CC | HT |                    |     |     |       | NF        |                         |           |                         |                         |
|        |                          |          | NT |                    |     |     |       |           |                         |           |                         |                         |
|        | rs11105361<br>(88576810) | CC/CA/AA | HT |                    |     |     |       | NF        |                         |           |                         |                         |
|        |                          |          | NT |                    |     |     |       |           |                         |           |                         |                         |
|        | rs7131965<br>(88590466)  | TT/TC/CC | HT | 731                | 15  | 0   | 0.025 | 98.7      | 0.90                    | 0.83      |                         | (0.468)                 |
|        |                          |          | NT | 707                | 11  | 1   | 0.990 |           | (0.778)                 | (0.627)   |                         |                         |
|        | rs11105364<br>(88593407) | TT/TG/GG | HT | 335                | 322 | 88  | 0.276 | 97.2      | 1.29                    | 1.36      | 1.44                    | (0.005)                 |
|        |                          |          | NT | 261                | 323 | 113 | 0.295 |           | (0.001)                 | (0.004)   | (0.016)                 |                         |
|        | rs11105368<br>(88598572) | GG/GC/CC | HT | 349                | 284 | 89  | 0.883 | 94.0      | 1.25                    | 1.21      | 1.53                    | (0.015)                 |
|        |                          |          | NT | 294                | 260 | 119 | 0.212 |           | (0.005)                 | (0.082)   | (0.005)                 |                         |
|        | rs7136259<br>(88605319)  | TT/TC/CC | HT | 323                | 325 | 87  | 0.348 | 97.2      | 1.24                    | 1.22      | 1.50                    | (0.016)                 |
|        |                          |          | NT | 277                | 312 | 119 | 0.389 |           | (0.006)                 | (0.063)   | (0.007)                 |                         |
|        | rs17836871<br>(88606297) | TT/TC/CC | HT | 419                | 260 | 61  | 0.025 | 97.8      | 1.08                    | 1.16      | 0.90                    | (0.202)                 |
|        |                          |          | NT | 376                | 282 | 53  | 0.990 |           | (0.368)                 | (0.153)   | (0.577)                 |                         |
|        | rs11105378<br>(88614872) | TT/TC/CC | HT | 76                 | 301 | 359 | 0.276 | 97.3      | 0.73                    | 0.64      | 0.69                    | (4.6*10 <sup>-4</sup> ) |
|        |                          |          | NT | 108                | 320 | 280 | 0.295 |           | (6.3*10 <sup>-5</sup> ) | (0.005)   | (4.2*10 <sup>-4</sup> ) |                         |
|        | rs12230074<br>(88614998) | GG/GA/AA | HT | 83                 | 328 | 332 | 0.883 | 97.6      | 0.82                    | 0.70      | 0.82                    | (0.036)                 |
|        |                          |          | NT | 108                | 316 | 282 | 0.212 |           | (0.013)                 | (0.021)   | (0.068)                 |                         |

**Table S5 Continued**

| Gene   | SNP<br>(position)        | Genotype |    | Screening Panel    |     |     |        |           | Odds ratio (p-value) |           |          |          |
|--------|--------------------------|----------|----|--------------------|-----|-----|--------|-----------|----------------------|-----------|----------|----------|
|        |                          |          |    | Genotype frequency |     |     | HWE    | Call rate | Allelic              | Recessive | Dominant | Additive |
| ATP2B1 | rs11105379<br>(88619304) | TT/TC/CC | HT | 450                | 240 | 39  | 0.348  | 96.3      | 1.11                 | 1.12      | 1.16     | (0.542)  |
|        |                          |          | NT | 413                | 244 | 43  | 0.389  |           | (0.261)              | (0.292)   | (0.520)  |          |
|        | rs10858918<br>(88620476) | TT/TC/CC | HT | 40                 | 266 | 442 | 0.998  | 98.6      | 0.90                 | 0.82      | 0.89     | (0.456)  |
|        |                          |          | NT | 46                 | 267 | 402 | 0.852  |           | (0.212)              | (0.378)   | (0.267)  |          |
|        | rs2113894<br>(88623528)  | AA/AT/TT | HT | 459                | 232 | 43  | 0.063  | 96.3      | 1.12                 | 1.14      | 1.17     | (0.458)  |
|        |                          |          | NT | 413                | 235 | 47  | 0.090  |           | (0.200)              | (0.228)   | (0.482)  |          |
|        | rs1358350<br>(88626023)  | TT/TA/AA | HT | 49                 | 202 | 445 | <0.001 | 91.8      | 0.85                 | 0.82      | 0.84     | (0.263)  |
|        |                          |          | NT | 56                 | 212 | 398 | <0.001 |           | (0.085)              | (0.345)   | (0.113)  |          |
|        | rs12369944<br>(88626925) | CC/CA/AA | HT | 617                | 97  | 15  | <0.001 | 94.5      | 1.27                 | 1.33      | 1.01     | (0.104)  |
|        |                          |          | NT | 542                | 117 | 14  | 0.013  |           | (0.066)              | (0.043)   | (0.976)  |          |
|        | rs2280715<br>(88627833)  | CC/CG/GG | HT | 463                | 223 | 54  | <0.001 | 97.0      | 1.14                 | 1.16      | 1.17     | (0.364)  |
|        |                          |          | NT | 413                | 228 | 59  | 0.001  |           | (0.137)              | (0.166)   | (0.425)  |          |
|        | rs11105381<br>(88630966) | GG/GA/AA | HT | 452                | 259 | 37  | 0.990  | 98.2      | 1.09                 | 1.09      | 1.18     | (0.621)  |
|        |                          |          | NT | 413                | 255 | 41  | 0.843  |           | (0.334)              | (0.398)   | (0.479)  |          |
|        | rs1590008<br>(88631856)  | TT/TC/CC | HT | 438                | 265 | 42  | 0.818  | 98.2      | 1.11                 | 1.12      | 1.18     | (0.508)  |
|        |                          |          | NT | 399                | 266 | 47  | 0.767  |           | (0.243)              | (0.288)   | (0.443)  |          |

The screening panel is comprised of 758 middle age-onset severe hypertensive patients and 726 middle-aged to elderly evidently normotensive controls (Table S4). NF; no genotype frequency

**Table S6 Association of 17 ATP2B4 SNPs with hypertension (screening panel)**

| Gene   | SNP<br>(position) | Genotype |    | Screening Panel    |     |     |        |           | Odds ratio (p-value) |                |          |          |
|--------|-------------------|----------|----|--------------------|-----|-----|--------|-----------|----------------------|----------------|----------|----------|
|        |                   |          |    | Genotype frequency |     |     | HWE    | Call rate | Allelic              | Recessive      | Dominant | Additive |
| ATP2B4 | rs4245719         | GG/GA/AA | HT | 287                | 343 | 117 | 0.389  | 98.5      | 0.90                 | 0.90           | 0.82     | (0.332)  |
|        |                   |          | NT | 293                | 327 | 94  | 0.854  |           | (0.153)              | (0.307)        | (0.175)  |          |
|        | rs4600103         | GG/GA/AA | HT | 286                | 312 | 129 | 0.007  | 94.3      | 1.03                 | 1.08           | 0.98     | (0.685)  |
|        |                   |          | NT | 252                | 304 | 117 | 0.128  |           | (0.678)              | (0.466)        | (0.860)  |          |
|        | rs17537593        | TT/TA/AA | HT | 64                 | 237 | 432 | <0.001 | 96.6      | 1.03                 | 1.33           | 0.97     | (0.252)  |
|        |                   |          | NT | 47                 | 246 | 407 | 0.240  |           | (0.704)              | (0.154)        | (0.761)  |          |
|        | rs4951273         | GG/GC/CC | HT | 114                | 339 | 289 | 0.377  | 97.9      | 1.11                 | 1.21           | 1.11     | (0.383)  |
|        |                   |          | NT | 93                 | 323 | 295 | 0.756  |           | (0.178)              | (0.214)        | (0.323)  |          |
|        | rs12749310        | GG/GA/AA | HT | 427                | 245 | 56  | 0.014  | 96.1      | 1.03                 | 1.10           | 0.81     | (0.256)  |
|        |                   |          | NT | 393                | 261 | 44  | 0.940  |           | (0.766)              | (0.370)        | (0.305)  |          |
|        | rs4297354         | GG/GA/AA | HT | 462                | 227 | 40  | 0.087  | 96.1      | <b>1.20</b>          | <b>1.27</b>    | 1.11     | (0.086)  |
|        |                   |          | NT | 402                | 253 | 42  | 0.794  |           | <b>(0.047)</b>       | <b>(0.028)</b> | (0.662)  |          |
|        | rs11576343        | TT/TC/CC | HT | 53                 | 251 | 432 | 0.051  | 97.3      | 0.92                 | 1.02           | 0.87     | (0.382)  |
|        |                   |          | NT | 50                 | 266 | 392 | 0.597  |           | (0.323)              | (0.918)        | (0.202)  |          |
|        | rs6594013         | TT/TA/AA | HT | 163                | 348 | 231 | 0.141  | 97.9      | 0.95                 | 0.98           | 0.89     | (0.587)  |
|        |                   |          | NT | 159                | 348 | 204 | 0.647  |           | (0.443)              | (0.856)        | (0.310)  |          |
|        | rs16852152        | GG/GA/AA | HT | 437                | 252 | 38  | 0.831  | 95.9      | 0.92                 | 0.92           | 0.82     | (0.618)  |
|        |                   |          | NT | 432                | 234 | 30  | 0.812  |           | (0.354)              | (0.449)        | (0.418)  |          |
|        | rs3766752         | GG/GA/AA | HT | 210                | 367 | 167 | 0.782  | 97.8      | 1.09                 | 1.15           | 1.10     | (0.454)  |
|        |                   |          | NT | 180                | 356 | 171 | 0.847  |           | (0.225)              | (0.235)        | (0.433)  |          |
|        | rs11808688        | GG/GA/AA | HT | 197                | 372 | 169 | 0.795  | 96.9      | 0.94                 | 0.86           | 1.00     | (0.370)  |
|        |                   |          | NT | 209                | 331 | 160 | 0.189  |           | (0.389)              | (0.183)        | (0.985)  |          |

**Table S6 Continued**

| Gene   | SNP<br>(position) | Genotype |    | Screening Panel    |     |     |       |           | Odds ratio (p-value) |           |          |          |
|--------|-------------------|----------|----|--------------------|-----|-----|-------|-----------|----------------------|-----------|----------|----------|
|        |                   |          |    | Genotype frequency |     |     | HWE   | Call rate | Allelic              | Recessive | Dominant | Additive |
| ATP2B4 | rs4951130         | GG/GA/AA | HT | 410                | 278 | 50  | 0.758 | 97.2      | <b>1.21</b>          | 1.22      | 1.40     | (0.082)  |
|        |                   |          | NT | 356                | 283 | 65  | 0.421 |           | <b>(0.025)</b>       | (0.058)   | (0.086)  |          |
|        | rs12095268        | TT/TA/AA | HT | 367                | 313 | 67  | 0.982 | 98.0      | 1.09                 | 1.09      | 1.19     | (0.556)  |
|        |                   |          | NT | 333                | 300 | 74  | 0.599 |           | (0.303)              | (0.439)   | (0.335)  |          |
|        | rs12410036        | TT/TC/CC | HT | 48                 | 256 | 439 | 0.200 | 97.7      | 0.90                 | 0.93      | 0.87     | (0.434)  |
|        |                   |          | NT | 49                 | 264 | 394 | 0.599 |           | (0.232)              | (0.720)   | (0.196)  |          |
|        | rs7547344         | GG/GA/AA | HT | 172                | 362 | 205 | 0.618 | 97.7      | 1.00                 | 1.02      | 0.98     | (0.954)  |
|        |                   |          | NT | 163                | 354 | 194 | 0.951 |           | (0.977)              | (0.875)   | (0.846)  |          |
|        | rs955865          | GG/GA/AA | HT | 208                | 368 | 173 | 0.677 | 98.6      | 0.95                 | 0.96      | 0.89     | (0.668)  |
|        |                   |          | NT | 204                | 359 | 151 | 0.765 |           | (0.456)              | (0.733)   | (0.370)  |          |
|        | rs955866          | TT/TC/CC | HT | 170                | 366 | 208 | 0.712 | 98.5      | 1.05                 | 1.11      | 1.04     | (0.702)  |
|        |                   |          | NT | 151                | 361 | 206 | 0.758 |           | (0.489)              | (0.401)   | (0.756)  |          |

The screening panel is comprised of 758 middle age-onset severe hypertensive patients and 726 middle-aged to elderly evidently normotensive controls (Table S4).



**Table S7 Meta-analysis of ATP2B1 SNPs with hypertension**

| SNP        | Coded Allele | Millennium GPJ      |                      |        | Global BPgen        |                      |       | Pooled              |                       |        |
|------------|--------------|---------------------|----------------------|--------|---------------------|----------------------|-------|---------------------|-----------------------|--------|
|            |              | OR (95% CI)         | P                    | N      | OR (95% CI)         | P                    | N     | OR (95% CI)         | P                     | N      |
| rs1401982  | A            | 1.19<br>(1.11-1.29) | 1.3*10 <sup>-6</sup> | 9,967  | 1.07<br>(1.02-1.12) | 0.010                | 19126 | 1.10<br>(1.06-1.15) | 1.5*10 <sup>-6</sup>  | 29,093 |
| rs2681472  | A            | 1.21<br>(1.13-1.30) | 1.8*10 <sup>-7</sup> | 10,039 | 1.14<br>(1.06-1.22) | 2.2*10 <sup>-4</sup> | 19055 | 1.17<br>(1.12-1.23) | 2.1*10 <sup>-10</sup> | 29,094 |
| rs11105364 | T            | 1.21<br>(1.13-1.30) | 1.5*10 <sup>-7</sup> | 10,014 | 1.13<br>(1.06-1.21) | 4.6*10 <sup>-4</sup> | 19151 | 1.17<br>(1.11-1.22) | 3.1*10 <sup>-10</sup> | 29,165 |
| rs11105378 | C            | 1.21<br>(1.13-1.30) | 1.5*10 <sup>-7</sup> | 9,972  | 1.13<br>(1.05-1.21) | 5.9*10 <sup>-4</sup> | 18894 | 1.17<br>(1.11-1.23) | 7.0*10 <sup>-10</sup> | 28,866 |

In both Japanese Millennium GPJ and Global BP gen, hypertensive subjects were defined as being treated with antihypertensive medication, or SBP greater or equal to 140 mmHg, or DBP greater or equal to 90 mmHg; normotensive subjects were defined as all of not treated with antihypertensive medication, and SBP less or equal to 120 mmHg, and DBP less or equal to 85 mmHg [8]. Adjusted odds ratio was calculated under additive model using multiple logistic regression analysis adjusted for age, age<sup>2</sup>, sex, BMI, and cohort variables. Within Global BPgen, individual cohort results were combined using inverse variance weighted meta-analysis of the effects on a log-odds-ratio scale.

**Table S8 Association of ATP2B1 SNPs and blood pressure traits in each Japanese cohort**

| SNP        | coded allele |      | cohort    |      |       |      | SBP         |      |                            | DBP         |      |              |
|------------|--------------|------|-----------|------|-------|------|-------------|------|----------------------------|-------------|------|--------------|
|            | allele       | %    | name      | n    | HWE   | CR   | coefficient | SE   | p                          | coefficient | SE   | p            |
| rs1401982  | A            | 61.9 | Ohasama   | 1569 | 0.227 | 98.6 | 0.35        | 0.60 | 0.558                      | 0.06        | 0.39 | 0.868        |
|            |              | 62.3 | Yokohama  | 2269 | 0.588 | 99.1 | -1.51       | 0.43 | <b>4.2*10<sup>-4</sup></b> | -0.75       | 0.29 | <b>0.009</b> |
|            |              | 62.6 | Shigaraki | 2191 | 0.908 | 96.4 | -1.72       | 0.56 | <b>0.002</b>               | -0.91       | 0.35 | <b>0.010</b> |
|            |              | 61.8 | Takashima | 1718 | 0.302 | 99.3 | -1.95       | 0.72 | <b>0.007</b>               | -0.90       | 0.41 | <b>0.028</b> |
|            |              | 61.7 | Suita     | 2529 | 0.506 | 99.7 | -0.80       | 0.57 | 0.160                      | -0.44       | 0.33 | 0.182        |
|            |              | 62.0 | Matsuyama | 803  | 0.175 | 99.4 | -1.27       | 0.97 | 0.194                      | -1.39       | 0.62 | <b>0.026</b> |
|            |              | 63.8 | Nomura    | 2865 | 0.611 | 99.6 | -1.39       | 0.56 | <b>0.020</b>               | -0.67       | 0.33 | <b>0.045</b> |
| rs2681472  | A            | 62.1 | Ohasama   | 1587 | 0.226 | 99.7 | 0.38        | 0.60 | 0.522                      | 0.06        | 0.39 | 0.887        |
|            |              | 62.6 | Yokohama  | 2278 | 0.321 | 99.5 | -1.52       | 0.43 | <b>3.8*10<sup>-4</sup></b> | -0.78       | 0.28 | <b>0.006</b> |
|            |              | 63.5 | Shigaraki | 2254 | 0.701 | 99.2 | -2.03       | 0.56 | <b>2.9*10<sup>-4</sup></b> | -1.15       | 0.35 | <b>0.001</b> |
|            |              | 62.3 | Takashima | 1718 | 0.257 | 99.3 | -2.25       | 0.72 | <b>0.002</b>               | -1.03       | 0.41 | <b>0.013</b> |
|            |              | 62.1 | Suita     | 2528 | 0.655 | 99.7 | -0.97       | 0.57 | 0.089                      | -0.49       | 0.33 | 0.131        |
|            |              | 62.1 | Matsuyama | 802  | 0.191 | 99.3 | -1.13       | 0.98 | 0.248                      | -1.39       | 0.62 | <b>0.026</b> |
|            |              | 64.3 | Nomura    | 2865 | 0.907 | 99.6 | -1.42       | 0.60 | <b>0.018</b>               | -0.69       | 0.34 | <b>0.041</b> |
| rs11105364 | T            | 62.2 | Ohasama   | 1589 | 0.203 | 99.8 | 0.42        | 0.60 | <b>0.477</b>               | 0.12        | 0.39 | <b>0.766</b> |
|            |              | 63.3 | Yokohama  | 2277 | 0.414 | 99.4 | -1.61       | 0.43 | <b>1.8*10<sup>-4</sup></b> | -0.79       | 0.29 | <b>0.006</b> |
|            |              | 64.3 | Shigaraki | 2234 | 0.410 | 98.3 | -2.11       | 0.56 | <b>1.7*10<sup>-4</sup></b> | -1.16       | 0.35 | <b>0.001</b> |
|            |              | 62.7 | Takashima | 1727 | 0.570 | 99.8 | -2.25       | 0.71 | <b>0.002</b>               | -0.98       | 0.41 | <b>0.017</b> |
|            |              | 62.4 | Suita     | 2530 | 0.635 | 99.8 | -1.08       | 0.57 | <b>0.058</b>               | -0.54       | 0.33 | <b>0.096</b> |
|            |              | 62.8 | Matsuyama | 805  | 0.285 | 99.6 | -1.05       | 0.98 | <b>0.285</b>               | -1.35       | 0.62 | <b>0.031</b> |
|            |              | 64.4 | Nomura    | 2851 | 0.495 | 99.1 | -1.30       | 0.60 | <b>0.030</b>               | -0.60       | 0.34 | <b>0.077</b> |

**Table S8 Continued**

| SNP        | coded allele |      | cohort    |      |       |      | SBP         |      |                            | DBP         |      |                            |
|------------|--------------|------|-----------|------|-------|------|-------------|------|----------------------------|-------------|------|----------------------------|
|            | allele       | %    | name      | n    | HWE   | CR   | coefficient | SE   | p                          | coefficient | SE   | p                          |
| rs11105378 | C            | 62.9 | Ohasama   | 1566 | 0.478 | 98.4 | 0.31        | 0.60 | <b>0.600</b>               | -0.04       | 0.39 | <b>0.914</b>               |
|            |              | 63.4 | Yokohama  | 2258 | 0.244 | 98.6 | -1.32       | 0.43 | <b>0.002</b>               | -0.66       | 0.29 | <b>0.022</b>               |
|            |              | 65.2 | Shigaraki | 2213 | 0.141 | 97.4 | -2.45       | 0.56 | <b>1.3*10<sup>-5</sup></b> | -1.31       | 0.35 | <b>2.2*10<sup>-4</sup></b> |
|            |              | 63.2 | Takashima | 1722 | 0.237 | 99.5 | -2.41       | 0.72 | <b>8.5*10<sup>-4</sup></b> | -1.15       | 0.41 | <b>0.006</b>               |
|            |              | 63.0 | Suita     | 2521 | 0.498 | 99.4 | -1.00       | 0.58 | <b>0.084</b>               | -0.42       | 0.33 | <b>0.207</b>               |
|            |              | 63.2 | Matsuyama | 803  | 0.434 | 99.4 | -1.14       | 0.99 | <b>0.249</b>               | -1.56       | 0.63 | <b>0.014</b>               |
|            |              | 65.7 | Nomura    | 2865 | 0.468 | 99.6 | -1.11       | 0.60 | <b>0.065</b>               | -0.47       | 0.34 | <b>0.164</b>               |

Coefficients and standardized error for systolic and diastolic BP were calculated under additive model using multiple regression analysis adjusted for age, age<sup>2</sup>, sex, BMI. Adjustment for treatment with antihypertensive medication was achieved by adding fixed constants to measured values (+15mmHg for SBP and +10mmHg for DBP). CR indicates call rate.

**Table S9 Association of European GWAS-derived SNPs with hypertension in the Japanese screening and replication panels**

| SNP                   | Genotype | Screening panel    |     |           |                |                    | Replication panel |                              |                |                |      | overall |      |                              |                              |
|-----------------------|----------|--------------------|-----|-----------|----------------|--------------------|-------------------|------------------------------|----------------|----------------|------|---------|------|------------------------------|------------------------------|
|                       |          | Genotype frequency | HWE | Call rate | Odds (p value) | Genotype frequency | HWE               | Call rate                    | Odds (p value) | Odds (p value) |      |         |      |                              |                              |
| FGF5<br>rs1458038     | TT/TC/CC | HT                 | 92  | 338       | 315            | 0.928              | 98.0              | <b>1.19</b>                  | 271            | 838            | 788  | 0.047   | 97.9 | <b>1.21</b>                  | <b>1.20</b>                  |
|                       |          | NT                 | 81  | 281       | 347            | 0.039              |                   | <b>0.030</b>                 | 225            | 801            | 918  | 0.014   |      | <b>(1.1*10<sup>-4</sup>)</b> | <b>(9.9*10<sup>-6</sup>)</b> |
| CYP17A1<br>rs1004467  | AA/AG/GG | HT                 | 380 | 299       | 66             | 0.514              | 98.6              | <b>1.35</b>                  | 894            | 869            | 168  | 0.034   | 99.8 | 1.09                         | <b>1.16</b>                  |
|                       |          | NT                 | 309 | 308       | 101            | 0.089              |                   | <b>(1.4*10<sup>-4</sup>)</b> | 877            | 901            | 205  | 0.236   |      | <b>(0.079)</b>               | <b>(4.9*10<sup>-4</sup>)</b> |
| CSK<br>rs1378942      | CC/CA/AA | HT                 | 483 | 236       | 25             | 0.557              | 98.0              | 1.09                         | 1237           | 605            | 72   | 0.853   | 98.9 | 1.04                         | 1.05                         |
|                       |          | NT                 | 452 | 223       | 35             | 0.274              |                   | 0.340                        | 1259           | 621            | 85   | 0.449   |      | <b>(0.536)</b>               | <b>(0.305)</b>               |
| PLCD3<br>rs12946454   | TT/TA/AA | HT                 | 28  | 210       | 510            | 0.276              | 98.8              | 1.12                         | 68             | 526            | 1339 | 0.070   | 99.7 | 0.99                         | 1.03                         |
|                       |          | NT                 | 13  | 207       | 499            | 0.107              |                   | 0.256                        | 68             | 545            | 1364 | 0.140   |      | <b>(0.907)</b>               | <b>(0.624)</b>               |
| PLEKHA7<br>rs381815   | TT/TC/CC | HT                 | 27  | 242       | 483            | 0.624              | 98.8              | 1.05                         | 85             | 567            | 1273 | 0.033   | 99.4 | 0.99                         | 1.01                         |
|                       |          | NT                 | 31  | 208       | 475            | 0.181              |                   | 0.596                        | 93             | 574            | 1308 | 0.004   |      | <b>(0.913)</b>               | <b>(0.852)</b>               |
| CSK-ULK3<br>rs6495122 | AA/AC/CC | HT                 | 508 | 204       | 21             | 0.924              | 96.8              | 1.18                         | 1289           | 561            | 72   | 0.263   | 99.2 | 1.10                         | <b>1.12</b>                  |
|                       |          | NT                 | 458 | 221       | 25             | 0.793              |                   | 0.085                        | 1267           | 626            | 77   | 0.976   |      | <b>(0.102)</b>               | <b>(0.021)</b>               |
| ULK4<br>rs9815354     | AA/AG/GG | HT                 | 7   | 142       | 598            | 0.654              | 98.5              | 0.90                         | 31             | 385            | 1507 | 0.265   | 98.9 | 1.05                         | 1.01                         |
|                       |          | NT                 | 10  | 144       | 561            | 0.826              |                   | 0.374                        | 26             | 382            | 1548 | 0.659   |      | <b>(0.463)</b>               | <b>(0.873)</b>               |

The screening panel is comprised of 758 middle age-onset severe hypertensive patients and 726 middle-aged to elderly evidently normotensive controls (Table S4). The replication panel consists of 1,929 hypertensive cases and 1,993 normotensives controls selected from a 11,569 cohort sample were enrolled (Table S2). Odds ratios and p-values for allelic model are shown.

**Table S10 Association of European GWAS-derived SNPs and blood pressure traits in each Japanese cohort**

| SNP                  | coded allele |      | cohort    |      |       |      | SBP         |      |              | DBP         |      |                            |
|----------------------|--------------|------|-----------|------|-------|------|-------------|------|--------------|-------------|------|----------------------------|
|                      | allele       | %    | name      | n    | HWE   | CR   | coefficient | SE   | p            | coefficient | SE   | p                          |
| FGF5<br>rs1458038    | T            | 33.7 | Ohasama   | 1557 | 0.174 | 97.8 | 1.58        | 0.60 | <b>0.008</b> | 0.44        | 0.39 | 0.260                      |
|                      |              | 33.5 | Yokohama  | 2223 | 0.005 | 97.1 | 0.84        | 0.44 | 0.055        | 0.46        | 0.29 | 0.115                      |
|                      |              | 33.8 | Shigaraki | 2156 | 0.001 | 94.9 | 1.17        | 0.56 | 0.037        | 0.46        | 0.35 | 0.196                      |
|                      |              | 31.4 | Takashima | 1714 | 0.163 | 99.1 | 2.43        | 0.73 | <b>0.001</b> | 1.62        | 0.42 | <b>1.0*10<sup>-4</sup></b> |
|                      |              | 33.6 | Suita     | 2533 | 0.508 | 99.9 | 0.67        | 0.58 | 0.250        | 0.43        | 0.33 | 0.191                      |
|                      |              | 33.4 | Matsuyama | 804  | 0.459 | 99.5 | 0.70        | 1.04 | 0.500        | 0.54        | 0.67 | 0.414                      |
|                      |              | 38.2 | Nomura    | 2841 | 0.105 | 98.8 | 1.85        | 0.58 | <b>0.002</b> | 1.09        | 0.33 | <b>0.001</b>               |
| CYP17A1<br>rs1004467 | A            | 70.2 | Ohasama   | 1579 | 0.254 | 99.2 | 1.41        | 0.45 | <b>0.002</b> | 0.48        | 0.30 | 0.110                      |
|                      |              | 68.4 | Yokohama  | 2276 | 0.812 | 99.4 | 1.05        | 0.57 | 0.065        | 0.03        | 0.36 | 0.938                      |
|                      |              | 65.5 | Shigaraki | 2244 | 0.898 | 98.7 | 1.46        | 0.74 | <b>0.050</b> | 0.83        | 0.43 | 0.051                      |
|                      |              | 67.8 | Takashima | 1714 | 0.573 | 99.1 | -0.21       | 0.59 | 0.721        | -0.34       | 0.34 | 0.308                      |
|                      |              | 66.8 | Suita     | 2533 | 0.865 | 99.9 | 0.12        | 1.05 | 0.911        | -0.10       | 0.67 | 0.885                      |
|                      |              | 67.4 | Matsuyama | 804  | 0.388 | 99.5 | 1.25        | 0.62 | 0.045        | 0.50        | 0.35 | 0.149                      |
|                      |              | 69.7 | Nomura    | 2859 | 0.475 | 99.4 | 1.41        | 0.45 | <b>0.002</b> | 0.48        | 0.30 | 0.110                      |
| CSK<br>rs1378942     | C            | 77.7 | Ohasama   | 1575 | 0.821 | 98.9 | -0.17       | 0.68 | 0.804        | -0.53       | 0.45 | 0.241                      |
|                      |              | 78.1 | Yokohama  | 2245 | 0.152 | 98.0 | 0.73        | 0.52 | 0.157        | 0.48        | 0.35 | 0.167                      |
|                      |              | 83.0 | Shigaraki | 2225 | 0.187 | 97.9 | 1.80        | 0.71 | 0.012        | 1.35        | 0.45 | <b>0.003</b>               |
|                      |              | 80.7 | Takashima | 1703 | 0.808 | 98.4 | -0.41       | 0.88 | 0.644        | 0.08        | 0.51 | 0.870                      |
|                      |              | 80.5 | Suita     | 2528 | 0.098 | 99.7 | 1.28        | 0.69 | 0.063        | 0.43        | 0.39 | 0.270                      |
|                      |              | 79.7 | Matsuyama | 798  | 0.846 | 98.8 | 0.24        | 1.21 | 0.842        | 0.07        | 0.77 | 0.923                      |
|                      |              | 81.0 | Nomura    | 2848 | 0.075 | 99.0 | 1.18        | 0.72 | 0.103        | 0.63        | 0.41 | 0.121                      |

**Table S10 Continued**

| SNP                   | coded allele |      | cohort    |      |       |       | SBP         |      |              | DBP         |      |              |
|-----------------------|--------------|------|-----------|------|-------|-------|-------------|------|--------------|-------------|------|--------------|
|                       | allele       | %    | name      | n    | HWE   | CR    | coefficient | SE   | p            | coefficient | SE   | p            |
| PLCD3<br>rs12946454   | T            | 81.6 | Ohasama   | 1583 | 0.356 | 99.4  | 1.76        | 0.72 | <b>0.015</b> | 0.99        | 0.48 | <b>0.038</b> |
|                       |              | 83.0 | Yokohama  | 2274 | 0.517 | 99.3  | 0.23        | 0.56 | 0.687        | 0.12        | 0.37 | 0.752        |
|                       |              | 83.3 | Shigaraki | 2242 | 0.966 | 98.6  | 0.46        | 0.72 | 0.524        | 0.76        | 0.46 | 0.094        |
|                       |              | 85.3 | Takashima | 1712 | 0.707 | 99.0  | -1.37       | 0.98 | 0.163        | -1.09       | 0.56 | 0.052        |
|                       |              | 83.2 | Suita     | 2528 | 0.234 | 99.7  | 0.53        | 0.73 | 0.464        | 0.08        | 0.42 | 0.845        |
|                       |              | 82.4 | Matsuyama | 805  | 0.799 | 99.6  | 0.34        | 1.28 | 0.790        | 0.86        | 0.82 | 0.290        |
|                       |              | 82.4 | Nomura    | 2861 | 0.142 | 99.5  | -0.35       | 0.75 | 0.635        | -0.05       | 0.42 | 0.899        |
| PLEKHA7<br>rs381815   | T            | 15.1 | Ohasama   | 1590 | 0.566 | 99.9  | 0.22        | 0.79 | 0.778        | 0.23        | 0.52 | 0.657        |
|                       |              | 19.7 | Yokohama  | 2281 | 0.457 | 99.6  | -0.77       | 0.52 | 0.139        | 0.04        | 0.35 | 0.900        |
|                       |              | 19.3 | Shigaraki | 2248 | 0.587 | 98.9  | -0.38       | 0.68 | 0.574        | -0.90       | 0.43 | <b>0.034</b> |
|                       |              | 19.0 | Takashima | 1719 | 0.434 | 99.4  | -0.196      | 0.87 | 0.271        | -0.22       | 0.50 | 0.660        |
|                       |              | 20.2 | Suita     | 2527 | 0.421 | 99.6  | 0.76        | 0.69 | 0.272        | 0.42        | 0.40 | 0.289        |
|                       |              | 20.2 | Matsuyama | 808  | 0.496 | 100.0 | 0.99        | 1.19 | 0.408        | 0.53        | 0.76 | 0.489        |
|                       |              | 23.2 | Nomura    | 2859 | 0.007 | 99.4  | 0.88        | 0.66 | 0.187        | 0.73        | 0.37 | 0.052        |
| CSK-ULK3<br>rs6495122 | A            | 79.4 | Ohasama   | 1581 | 0.050 | 99.3  | -0.39       | 0.69 | 0.569        | -0.46       | 0.45 | 0.308        |
|                       |              | 78.4 | Yokohama  | 2288 | 0.157 | 99.9  | 0.88        | 0.51 | 0.086        | 0.66        | 0.34 | 0.055        |
|                       |              | 83.5 | Shigaraki | 2237 | 0.146 | 98.4  | 0.96        | 0.72 | 0.183        | 0.96        | 0.45 | <b>0.034</b> |
|                       |              | 80.6 | Takashima | 1720 | 0.221 | 99.4  | 0.03        | 0.86 | 0.969        | 0.06        | 0.49 | 0.907        |
|                       |              | 81.6 | Suita     | 2529 | 0.004 | 99.7  | 0.87        | 0.69 | 0.211        | 0.18        | 0.40 | 0.654        |
|                       |              | 81.5 | Matsuyama | 806  | 0.734 | 99.8  | 1.35        | 1.24 | 0.276        | 0.68        | 0.79 | 0.391        |
|                       |              | 82.6 | Nomura    | 2855 | 0.115 | 99.3  | 1.16        | 0.75 | 0.120        | 0.64        | 0.42 | 0.129        |

**Table S10 Continued**

| SNP               | coded allele |      | cohort    |      |       |      | SBP         |      |              | DBP         |      |              |
|-------------------|--------------|------|-----------|------|-------|------|-------------|------|--------------|-------------|------|--------------|
|                   | allele       | %    | name      | n    | HWE   | CR   | coefficient | SE   | p            | coefficient | SE   | p            |
| ULK4<br>rs9815354 | A            | 14.9 | Ohasama   | 1569 | 0.749 | 98.6 | -0.08       | 0.80 | 0.918        | 0.32        | 0.53 | 0.543        |
|                   |              | 10.5 | Yokohama  | 2269 | 0.122 | 99.1 | -1.01       | 0.67 | 0.134        | -0.44       | 0.45 | 0.331        |
|                   |              | 12.7 | Shigaraki | 2252 | 0.099 | 99.1 | -1.58       | 0.80 | <b>0.047</b> | -0.10       | 0.50 | 0.846        |
|                   |              | 12.0 | Takashima | 1710 | 0.201 | 98.8 | -0.57       | 1.08 | 0.600        | 0.15        | 0.62 | 0.802        |
|                   |              | 11.9 | Suita     | 2521 | 0.456 | 99.4 | -1.03       | 0.86 | 0.232        | -0.08       | 0.49 | 0.867        |
|                   |              | 11.4 | Matsuyama | 804  | 0.389 | 99.5 | -0.91       | 1.50 | 0.547        | 0.70        | 0.96 | 0.467        |
|                   |              | 9.1  | Nomura    | 2853 | 0.632 | 99.2 | 0.79        | 1.00 | 0.427        | 1.21        | 0.56 | <b>0.030</b> |

Coefficients and standardized error for systolic and diastolic BP were calculated under additive model using multiple regression analysis adjusted for age, age2, sex, BMI. Adjustment for treatment with antihypertensive medication was achieved by adding fixed constants to measured values (+15mmHg for SBP and +10mmHg for DBP).

**Table S11 Multiple linear regression analysis for BP trait and hypertension**

| Parameters                           | Coded allele | Systolic blood pressure |                          |                      | Diastolic blood pressure |                          |                      | Hypertension        |                      |
|--------------------------------------|--------------|-------------------------|--------------------------|----------------------|--------------------------|--------------------------|----------------------|---------------------|----------------------|
|                                      |              | Coefficient             | Standardized coefficient | P                    | Coefficient              | Standardized coefficient | P                    | Odds (95% C.I.)     | p                    |
| Sex                                  |              | 2.38                    | 0.05                     | <0.001               | 3.15                     | 0.12                     | <0.001               | 1.33<br>(1.18-1.50) | <0.001               |
| Age (years)                          |              | 0.31                    | 0.19                     | <0.001               | 0.96                     | 1.03                     | <0.001               | 1.15<br>(1.12-1.19) | <0.001               |
| Age <sup>2</sup>                     |              | 0.00                    | 0.25                     | <0.001               | -0.01                    | -0.74                    | <0.001               | 0.99<br>(0.99-0.99) | 0.008                |
| Body mass index (kg/m <sup>2</sup> ) |              | 1.80                    | 0.25                     | <0.001               | 1.12                     | 0.27                     | <0.001               | 1.28<br>(1.26-1.30) | <0.001               |
| Habitual drinking                    |              | 0.79                    | 0.02                     | 0.035                | 0.93                     | 0.04                     | <0.001               | 1.24<br>(1.11-1.40) | <0.001               |
| ATP2B1 rs11105378                    | C            | 1.32                    | 0.04                     | 4.4*10 <sup>-8</sup> | 0.71                     | 0.04                     | 6.1*10 <sup>-7</sup> | 1.21<br>(1.12-1.30) | 4.0*10 <sup>-7</sup> |
| FGF5 rs1458038                       | T            | 1.36                    | 0.04                     | 1.5*10 <sup>-8</sup> | 0.77                     | 0.04                     | 6.4*10 <sup>-8</sup> | 1.20<br>(1.11-1.29) | 1.4*10 <sup>-6</sup> |
| CYP17A1 rs1004467                    | A            | 0.97                    | 0.03                     | 8.9*10 <sup>-5</sup> | 0.35                     | 0.02                     | 0.017                | 1.14<br>(1.06-1.23) | 8.4*10 <sup>-4</sup> |
| CSK rs1378942                        | C            | 0.71                    | 0.02                     | 0.014                | 0.36                     | 0.02                     | 0.036                | 1.09<br>(1.00-1.19) | 0.046                |

Coefficients for systolic and diastolic BP were calculated using multiple linear regression analysis adjusted cohort variables. Adjustment for treatment with antihypertensive medication was achieved by adding fixed constants to measured values (+15mmHg for SBP and +10mmHg for DBP). Hypertensive subjects were defined as being treated with antihypertensive medication, or SBP greater or equal to 140 mmHg, or DBP greater or equal to 90 mmHg; normotensive subjects were defined as all of not treated with antihypertensive medication, and SBP less or equal to 120 mmHg, and DBP less or equal to 85 mmHg [8].



**FIGURE S1**

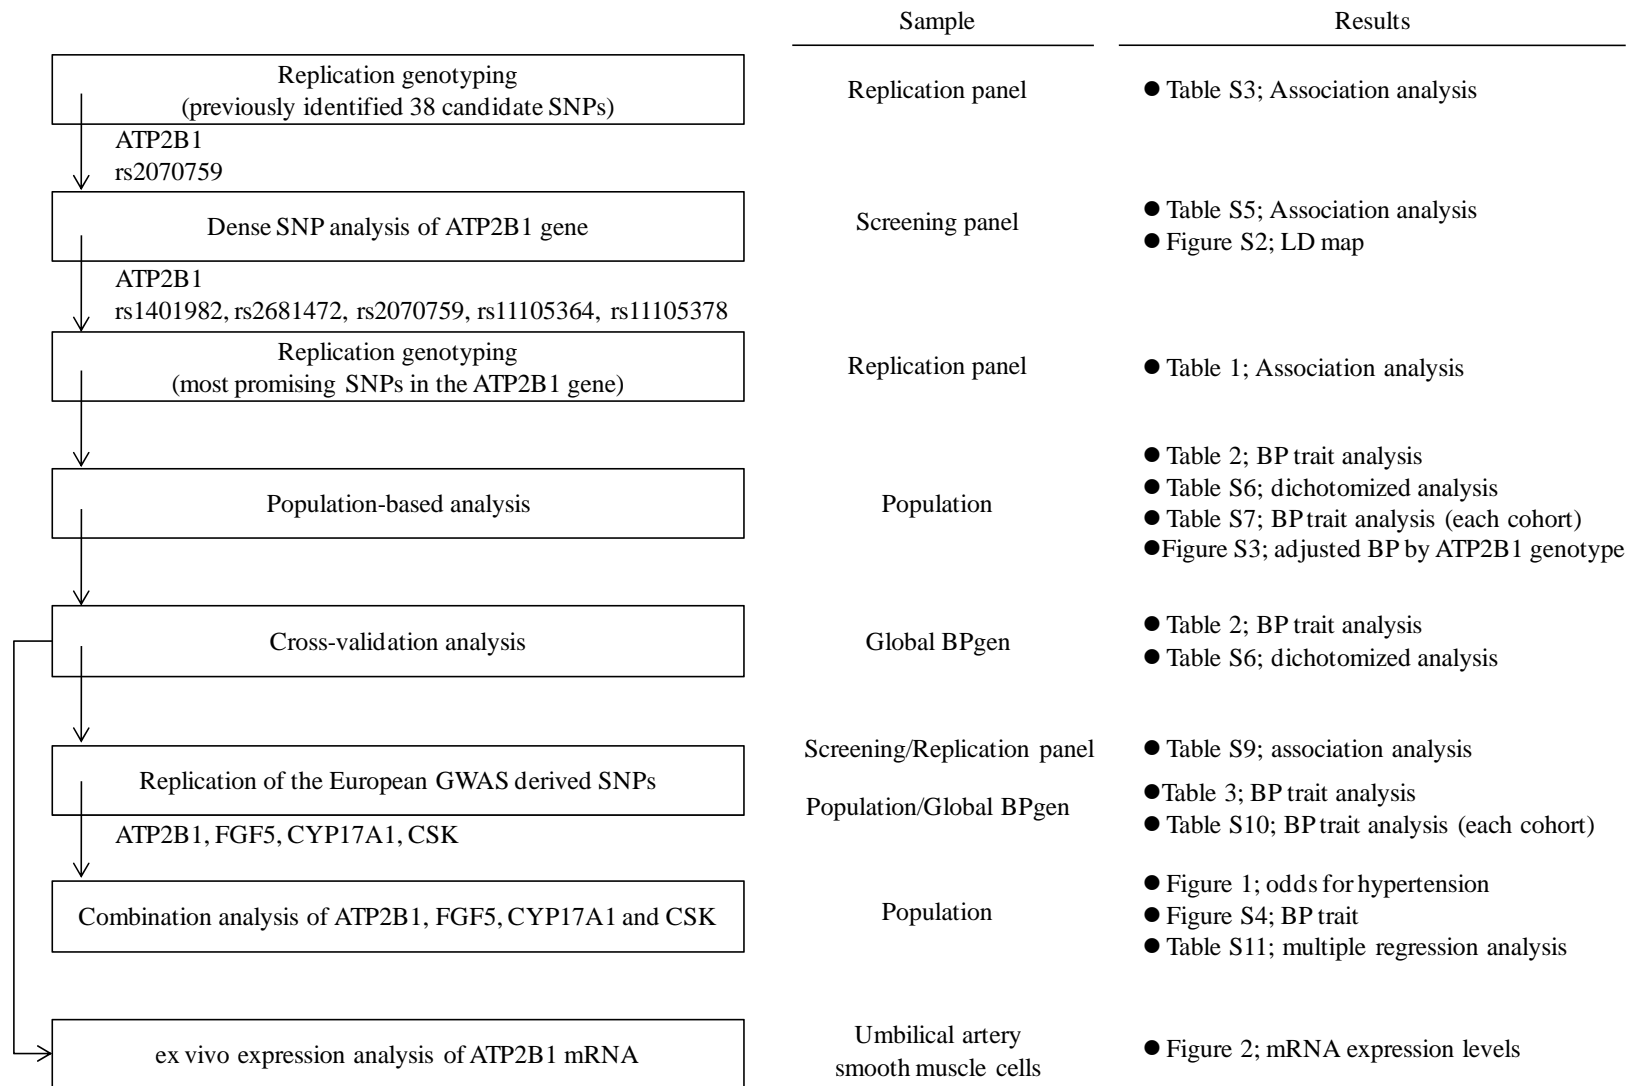

**Figure S1 Study procedure and corresponding samples and results**

**FIGURE S2**

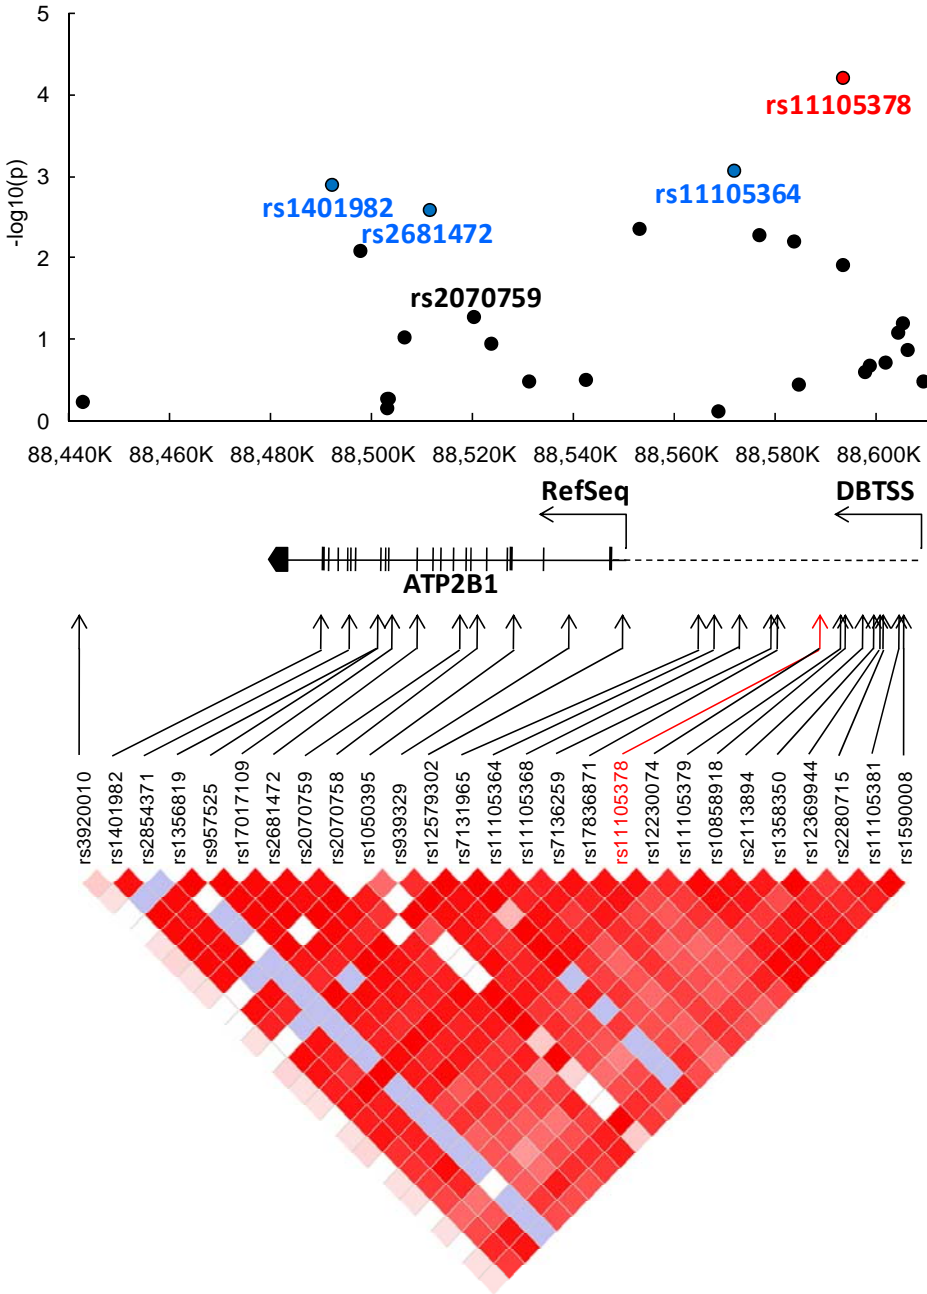

**Figure S2 Dense SNP analysis of the ATP2B1 gene**

The top graph shows p-values ( $-\log_{10}(P)$ ) of association analyses using the screening panel (Table S4). The red circle (rs11105378) indicates the SNP showing the most significant association with hypertension. The lower panel shows a LD ( $D'$ ) map based on the genotype frequency of the control subjects

**FIGURE S3**

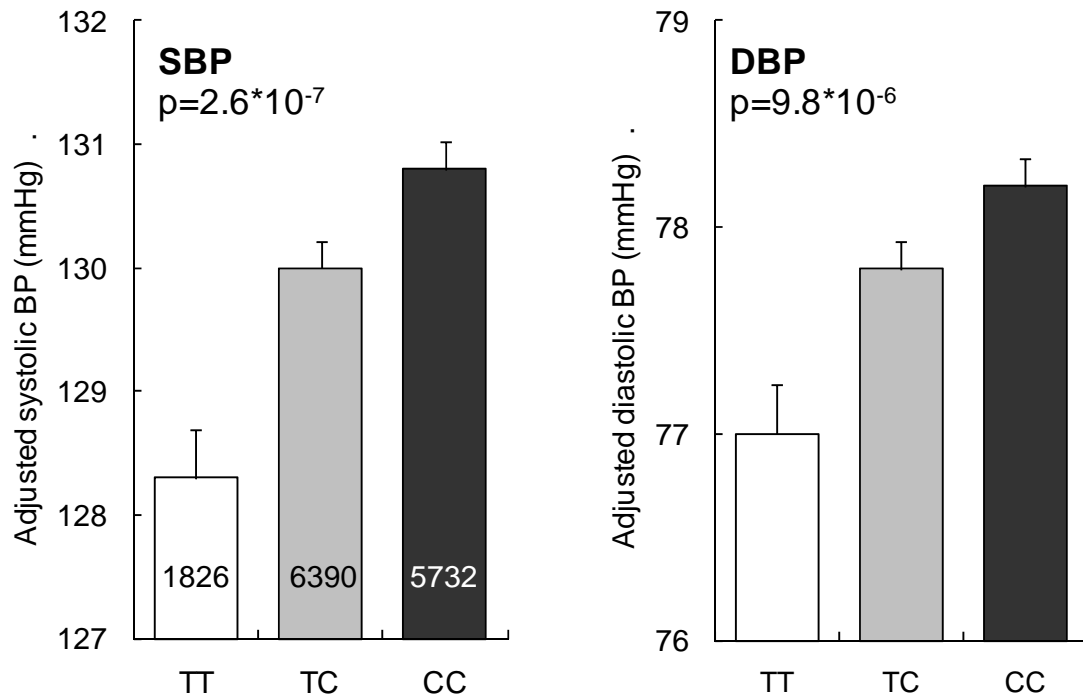

**Figure S3 Adjusted systolic and diastolic BP among rs11105378 genotype**

Values are mean $\pm$ standard error adjusted for age, sex, body mass index, and cohort variables. Number of subjects in each genotype is represented in column.

**FIGURE S4**

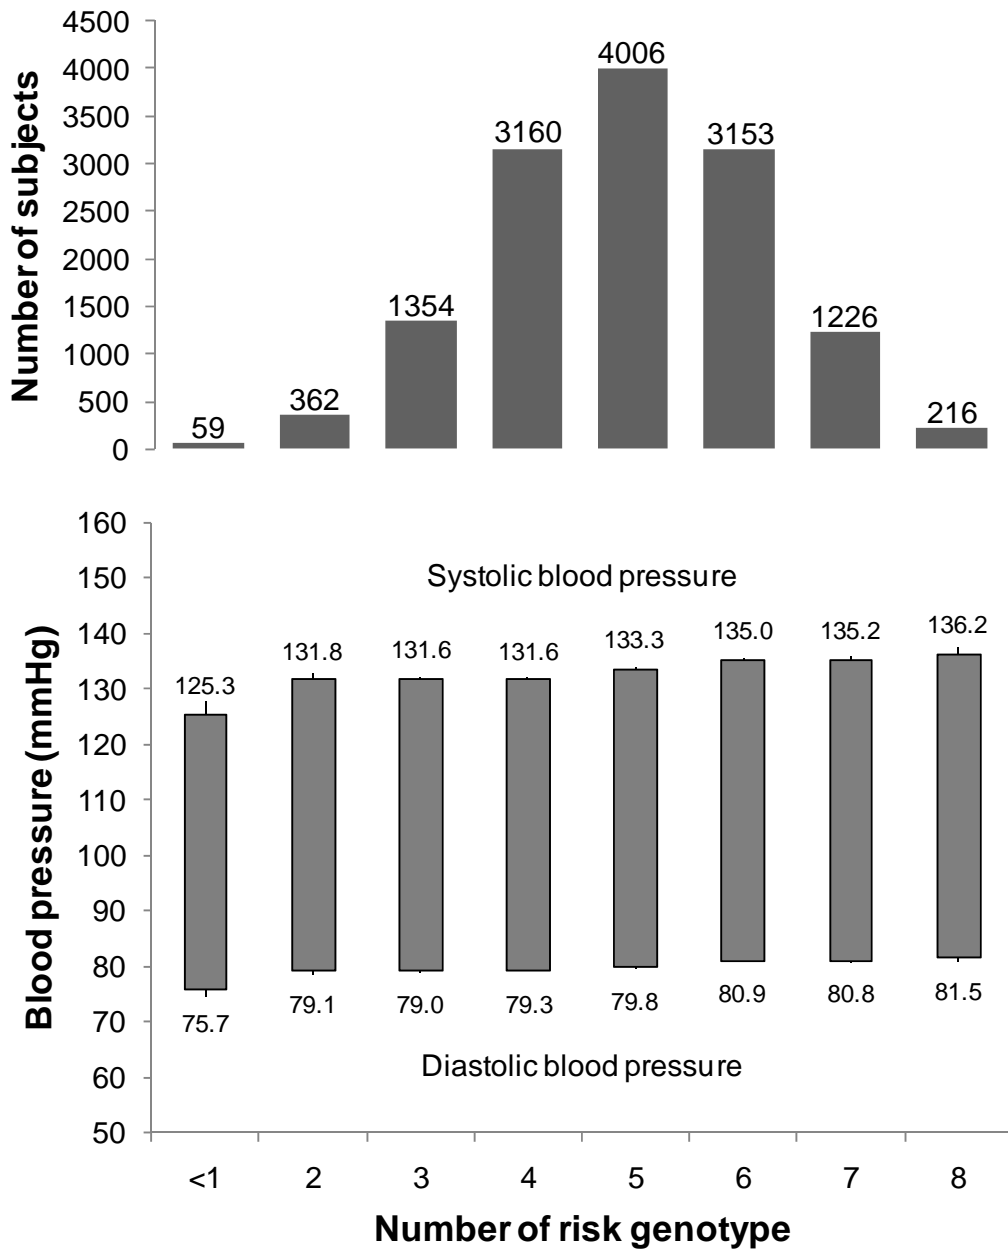

**Figure S4 Adjusted blood pressure by the number of risk genotypes**

Number of risk genotype was calculated by the following four SNPs; *ATP2B1* rs1105378, *FGF5* rs1458038, *CYP17A1*, rs1004467 and *CSK* rs1378942. Age, age2, sex, BMI and cohort variable adjusted systolic and diastolic BP is shown in the lower panel. Upper panel indicates the number of subjects in each group.

## THE GLOBAL BPGEN CONSORTIUM

Christopher Newton-Cheh<sup>1,2,3</sup>, Toby Johnson<sup>4,5,6</sup>, Vesela Gateva<sup>7</sup>, Martin D Tobin<sup>8</sup>, Murielle Bochud<sup>5</sup>, Lachlan Coin<sup>9</sup>, Samer S Najjar<sup>10</sup>, Jing Hua Zhao<sup>11,12</sup>, Simon C Heath<sup>13</sup>, Susana Eyheramendy<sup>14,15</sup>, Konstantinos Papadakis<sup>16</sup>, Benjamin F Voight<sup>1,3</sup>, Laura J Scott<sup>7</sup>, Feng Zhang<sup>17</sup>, Martin Farrall<sup>18,19</sup>, Toshiko Tanaka<sup>20,21</sup>, Chris Wallace<sup>22,23</sup>, John C Chambers<sup>9</sup>, Kay-Tee Khaw<sup>12,24</sup>, Peter Nilsson<sup>25</sup>, Pim van der Harst<sup>26</sup>, Silvia Polidoro<sup>27</sup>, Diederick E Grobbee<sup>28</sup>, N Charlotte Onland-Moret<sup>28,29</sup>, Michiel L Bots<sup>28</sup>, Louise V Wain<sup>8</sup>, Katherine S Elliott<sup>19</sup>, Alexander Teumer<sup>30</sup>, Jian'an Luan<sup>11</sup>, Gavin Lucas<sup>31</sup>, Johanna Kuusisto<sup>32</sup>, Paul R Burton<sup>8</sup>, David Hadley<sup>16</sup>, Wendy L McArdle<sup>33</sup>, Wellcome Trust Case Control Consortium<sup>34</sup>, Morris Brown<sup>35</sup>, Anna Dominiczak<sup>36</sup>, Stephen J Newhouse<sup>22</sup>, Nilesh J Samani<sup>37</sup>, John Webster<sup>38</sup>, Eleftheria Zeggini<sup>19,39</sup>, Jacques S Beckmann<sup>4,40</sup>, Sven Bergmann<sup>4,6</sup>, Noha Lim<sup>41</sup>, Kijoung Song<sup>41</sup>, Peter Vollenweider<sup>42</sup>, Gerard Waeber<sup>42</sup>, Dawn M Waterworth<sup>41</sup>, Xin Yuan<sup>41</sup>, Leif Groop<sup>43,44</sup>, Marju Orho-Melander<sup>25</sup>, Alessandra Allione<sup>27</sup>, Alessandra Di Gregorio<sup>27,45</sup>, Simonetta Guarrera<sup>27</sup>, Salvatore Panico<sup>46</sup>, Fulvio Ricceri<sup>27</sup>, Valeria Romanazzi<sup>27,45</sup>, Carlotta Sacerdote<sup>47</sup>, Paolo Vineis<sup>9,27</sup>, Inês Barroso<sup>12,39</sup>, Manjinder S Sandhu<sup>11,12,24</sup>, Robert N Luben<sup>12,24</sup>, Gabriel J. Crawford<sup>3</sup>, Pekka Jousilahti<sup>48</sup>, Markus Perola<sup>48,49</sup>, Michael Boehnke<sup>7</sup>, Lori L Bonnycastle<sup>50</sup>, Francis S Collins<sup>50</sup>, Anne U Jackson<sup>7</sup>, Karen L Mohlke<sup>51</sup>, Heather M Stringham<sup>7</sup>, Timo T Valle<sup>52</sup>, Cristen J Willer<sup>7</sup>, Richard N Bergman<sup>53</sup>, Mario A Morken<sup>50</sup>, Angela Döring<sup>15</sup>, Christian Gieger<sup>15</sup>, Thomas Illig<sup>15</sup>, Thomas Meitinger<sup>54,55</sup>, Elin Org<sup>56</sup>, Arne Pfeufer<sup>54</sup>, H Erich Wichmann<sup>15,57</sup>, Sekar Kathiresan<sup>1,2,3</sup>, Jaume Marrugat<sup>31</sup>, Christopher J O'Donnell<sup>58,59</sup>, Stephen M Schwartz<sup>60,61</sup>, David S Siscovick<sup>60,61</sup>, Isaac Subirana<sup>31,62</sup>, Nelson B Freimer<sup>63</sup>, Anna-Liisa Hartikainen<sup>64</sup>, Mark I McCarthy<sup>19,65,66</sup>, Paul F O'Reilly<sup>9</sup>, Leena Peltonen<sup>39,49</sup>, Anneli Pouta<sup>64,67</sup>, Paul E de Jong<sup>68</sup>, Harold Snieder<sup>69</sup>, Wiek H van Gilst<sup>26</sup>, Robert Clarke<sup>70</sup>, Anuj Goel<sup>18,19</sup>, Anders Hamsten<sup>71</sup>, John F Peden<sup>18,19</sup>, Udo Seedorf<sup>72</sup>, Ann-Christine Syvänen<sup>73</sup>, Giovanni Tognoni<sup>74</sup>, Edward G Lakatta<sup>10</sup>, Serena Sanna<sup>75</sup>, Paul Scheet<sup>76</sup>, David Schlessinger<sup>77</sup>, Angelo Scuteri<sup>78</sup>, Marcus Dörr<sup>79</sup>, Florian Ernst<sup>30</sup>, Stephan B Felix<sup>79</sup>, Georg Homuth<sup>30</sup>, Roberto Lorbeer<sup>80</sup>, Thorsten Reffelmann<sup>79</sup>, Rainer Rettig<sup>81</sup>, Uwe Völker<sup>30</sup>, Pilar Galan<sup>82</sup>, Ivo G Gut<sup>13</sup>, Serge Hercberg<sup>82</sup>, G Mark Lathrop<sup>13</sup>, Diana Zeleneka<sup>13</sup>, Panos Deloukas<sup>12,39</sup>, Nicole Soranzo<sup>17,39</sup>, Frances M Williams<sup>17</sup>, Guangju Zhai<sup>17</sup>, Veikko Salomaa<sup>48</sup>, Markku Laakso<sup>32</sup>, Roberto Elosua<sup>31,62</sup>, Nita G Forouhi<sup>11</sup>, Henry Völzke<sup>80</sup>, Cuno S Uiterwaal<sup>28</sup>, Yvonne T van der Schouw<sup>28</sup>, Mattijs E Numans<sup>28</sup>, Giuseppe Matullo<sup>27,45</sup>, Gerjan Navis<sup>68</sup>, Göran Berglund<sup>25</sup>, Sheila A Bingham<sup>12,83</sup>, Jaspal S Kooner<sup>84</sup>, John M Connell<sup>36</sup>, Stefania Bandinelli<sup>85</sup>, Luigi Ferrucci<sup>21</sup>, Hugh Watkins<sup>18,19</sup>, Tim D Spector<sup>17</sup>, Jaakko Tuomilehto<sup>52,86,87</sup>, David Altshuler<sup>1,3,88,89</sup>, David P Strachan<sup>16</sup>, Maris Laan<sup>56</sup>, Pierre Meneton<sup>90</sup>, Nicholas J Wareham<sup>11,12</sup>, Manuela Uda<sup>75</sup>, Marjo-Riitta Jarvelin<sup>9,67,91</sup>, Vincent Mooser<sup>41</sup>, Olle Melander<sup>25</sup>, Ruth JF Loos<sup>11,12</sup>, Paul Elliott<sup>9</sup>, Gonçalo R Abecasis<sup>92</sup>, Mark Caulfield<sup>22</sup>, Patricia B Munroe<sup>22</sup>

1. Center for Human Genetic Research, Massachusetts General Hospital, 185 Cambridge Street, Boston, MA 02114, USA
2. Cardiovascular Research Center, Massachusetts General Hospital, Boston, Massachusetts 02114, USA
3. Program in Medical and Population Genetics, Broad Institute of Harvard and Massachusetts Institute of Technology, Cambridge, Massachusetts, 02142, USA
4. Department of Medical Genetics, University of Lausanne, 1005 Lausanne, Switzerland
5. University Institute for Social and Preventative Medicine, Centre Hospitalier Universitaire Vaudois (CHUV) and University of Lausanne, 1005 Lausanne, Switzerland
6. Swiss Institute of Bioinformatics, Switzerland
7. Department of Biostatistics and Center for Statistical Genetics, University of Michigan, Ann Arbor, MI 48109, USA
8. Departments of Health Sciences & Genetics, Adrian Building, University of Leicester, University Road, Leicester LE1 7RH
9. Department of Epidemiology and Public Health, Imperial College London, St Mary's Campus, Norfolk Place, London W2 1PG, UK
10. Laboratory of Cardiovascular Science, Intramural Research Program, National Institute on Aging, National Institutes of Health, Baltimore, Maryland, USA 21224
11. MRC Epidemiology Unit, Institute of Metabolic Science, Addenbrooke's Hospital, Cambridge CB2 0QQ, UK
12. Cambridge - Genetics of Energy Metabolism (GEM) Consortium, Cambridge, UK
13. Centre National de Génotypage, 2 rue Gaston Crémieux, CP 5721, 91 057 Evry Cedex, France
14. Pontificia Universidad Católica de Chile, Vicuña Mackenna 4860, Facultad de Matemáticas, Casilla 306, Santiago 22, Chile, 7820436
15. Institute of Epidemiology, Helmholtz Zentrum München, German Research Centre for Environmental Health, 85764 Neuherberg, Germany
16. Division of Community Health Sciences, St George's, University of London, London SW17 0RE, UK
17. Department of Twin Research & Genetic Epidemiology, King's College London, London SE1 7EH
18. Department of Cardiovascular Medicine, University of Oxford
19. The Wellcome Trust Centre for Human Genetics, Roosevelt Drive, Oxford, OX3 7BN, UK
20. Medstar Research Institute, 3001 S. Hanover Street, Baltimore, MD 21250, USA
21. Clinical Research Branch, National Institute on Aging, Baltimore, MD, 21250 USA
22. Clinical Pharmacology and The Genome Centre, William Harvey Research Institute, Barts and The London School of Medicine and Dentistry, Queen Mary University of London, London EC1M 6BQ

23. JDRF/WT Diabetes and Inflammation Laboratory, Cambridge Institute for Medical Research University of Cambridge, Wellcome Trust/MRC Building, Addenbrooke's Hospital Cambridge, CB2 0XY
24. Department of Public Health and Primary Care, Institute of Public Health, University of Cambridge, Cambridge CB2 2SR, UK
25. Department of Clinical Sciences, Lund University, Malmö University Hospital, SE-20502 Malmö, Sweden
26. Department of Cardiology University Medical Center Groningen, University of Groningen, Hanzeplein 1, 9700 RB Groningen, The Netherlands
27. ISI Foundation (Institute for Scientific Interchange), Villa Gualino, Torino, 10133, Italy
28. Julius Center for Health Sciences and Primary Care, University Medical Center Utrecht, STR 6.131, PO Box 85500, 3508 GA Utrecht, The Netherlands
29. Complex Genetics Section, Department of Medical Genetics - DBG, University Medical Center Utrecht, STR 2.2112, PO Box 85500, 3508 GA Utrecht, The Netherlands.
30. Interfaculty Institute for Genetics and Functional Genomics, Ernst-Moritz-Arndt-University Greifswald, 17487 Greifswald, Germany
31. Cardiovascular Epidemiology and Genetics, Institut Municipal d'Investigació Mèdica, Barcelona, Spain
32. Department of Medicine University of Kuopio 70210 Kuopio, Finland
33. ALSPAC Laboratory, Department of Social Medicine, University of Bristol, BS8 2BN, UK
34. A full list of authors is provided in the supplementary methods online.
35. Clinical Pharmacology Unit, University of Cambridge, Addenbrookes Hospital, Cambridge, UK CB2 2QQ
36. BHF Glasgow Cardiovascular Research Centre, University of Glasgow, Glasgow, UK G12 8TA
37. Department of Cardiovascular Science, University of Leicester, Glenfield Hospital, Groby Road, Leicester, LE3 9QP, UK
38. Aberdeen Royal Infirmary, Aberdeen, UK
39. Wellcome Trust Sanger Institute, Wellcome Trust Genome Campus, Hinxton, Cambridge CB10 1SA, UK
40. Service of Medical Genetics, Centre Hospitalier Universitaire Vaudois (CHUV), Lausanne, 1011, Switzerland
41. Genetics Division, GlaxoSmithKline, King of Prussia, PA 19406, USA
42. Department of Internal Medicine, Centre Hospitalier Universitaire Vaudois (CHUV) 1011 Lausanne, Switzerland
43. Department of Clinical Sciences, Diabetes and Endocrinology Research Unit, University Hospital, Malmö
44. Lund University, Malmö S-205 02, Sweden

45. Department of Genetics, Biology and Biochemistry, University of Torino, Torino, 10126, Italy
46. Department of Clinical and Experimental Medicine, Federico II University, Naples, 80100, Italy
47. Unit of Cancer Epidemiology, University of Turin and Centre for Cancer Epidemiology and Prevention (CPO Piemonte), Turin, 10126, Italy
48. National Institute for Welfare and Health P.O. Box 30, FI-00271 Helsinki, Finland
49. Institute for Molecular Medicine Finland FIMM, University of Helsinki and National Public Health Institute
50. Genome Technology Branch, National Human Genome Research Institute, Bethesda, MD 20892, USA
51. Department of Genetics, University of North Carolina, Chapel Hill, NC 27599, USA
52. Diabetes Unit, Department of Epidemiology and Health Promotion, National Public Health Institute, 00300 Helsinki, Finland
53. Physiology and Biophysics USC School of Medicine 1333 San Pablo Street, MMR 626 Los Angeles, California 90033
54. Institute of Human Genetics, Helmholtz Zentrum München, German Research Centre for Environmental Health, 85764 Neuherberg, Germany
55. Institute of Human Genetics, Technische Universität München, 81675 Munich, Germany
56. Institute of Molecular and Cell Biology, University of Tartu, 51010 Tartu, Estonia
57. Ludwig Maximilians University, IBE, Chair of Epidemiology, Munich
58. Cardiovascular Research Center and Cardiology Division, Massachusetts General Hospital, Boston, Massachusetts 02114, USA
59. Framingham Heart Study and National, Heart, Lung, and Blood Institute, Framingham, Massachusetts 01702, USA
60. Cardiovascular Health Research Unit, Departments of Medicine and Epidemiology, University of Washington, Seattle, Washington, 98101 USA
61. Department of Epidemiology, University of Washington, Seattle, Washington, 98195 USA
62. CIBER Epidemiología y Salud Pública, Barcelona, Spain
63. Center for Neurobehavioral Genetics, Gonda Center, Room 3506, 695 Charles E Young Drive South, Box 951761, UCLA, Los Angeles, CA 90095.
64. Department of Clinical Sciences/ Obstetrics and Gynecology, P.O. Box 5000 Fin-90014, University of Oulu, Finland
65. Oxford Centre for Diabetes, Endocrinology and Metabolism, University of Oxford, Churchill Hospital, Old Road, Headington, Oxford OX3 7LJ, UK
66. Oxford NIHR Biomedical Research Centre, Churchill Hospital, Old Road, Headington, Oxford, UK OX3 7LJ
67. Department of Child and Adolescent Health, National Public Health Institute (KTL),



- Aapistie 1, P.O. Box 310, FIN-90101 Oulu, Finland
68. Division of Nephrology, Department of Medicine University Medical Center Groningen, University of Groningen, Hanzeplein 1, 9700 RB Groningen, The Netherlands
  69. Unit of Genetic Epidemiology and Bioinformatics, Department of Epidemiology University Medical Center Groningen, University of Groningen, Hanzeplein 1, 9700 RB Groningen, The Netherlands
  70. Clinical Trial Service Unit and Epidemiological Studies Unit (CTSU), University of Oxford, Richard Doll Building, Roosevelt Drive, Oxford, OX3 7LF, UK
  71. Atherosclerosis Research Unit, Department of Medicine Solna, Karolinska Institutet, Karolinska University Hospital Solna, Building L8:03, S-17176 Stockholm, Sweden
  72. Leibniz-Institut für Arterioskleroseforschung an der Universität Münster, Domagkstr. 3, D-48149, Münster, Germany
  73. Molecular Medicine, Department of Medical Sciences, Uppsala University, SE-751 85 Uppsala, Sweden
  74. Consorzio Mario Negri Sud, Via Nazionale, 66030 Santa Maria Imbaro (Chieti), Italy
  75. Istituto di Neurogenetica e Neurofarmacologia, CNR, Monserrato, 09042 Cagliari, Italy
  76. Department of Epidemiology, Univ. of Texas M. D. Anderson Cancer Center, Houston, TX 77030
  77. Laboratory of Genetics, Intramural Research Program, National Institute on Aging, National Institutes of Health, Baltimore, Maryland, USA 21224
  78. Unitá Operativa Geriatria, Istituto Nazionale Ricovero e Cura per Anziani (INRCA) IRCCS, Rome, Italy
  79. Department of Internal Medicine B, Ernst-Moritz-Arndt-University Greifswald, 17487 Greifswald, Germany
  80. Institute for Community Medicine, Ernst-Moritz-Arndt-University Greifswald, 17487 Greifswald, Germany
  81. Institute of Physiology, Ernst-Moritz-Arndt-University Greifswald, 17487 Greifswald, Germany
  82. U557 Institut National de la Santé et de la Recherche Médicale, U1125 Institut National de la Recherche Agronomique, Université Paris 13, 74 rue Marcel Cachin, 93017 Bobigny Cedex, France
  83. MRC Dunn Human Nutrition Unit, Wellcome Trust/MRC Building, Cambridge CB2 0XY, U.K
  84. National Heart and Lung Institute, Imperial College London SW7 2AZ
  85. Geriatric Rehabilitation Unit, Azienda Sanitaria Firenze (ASF), 50125, Florence, Italy
  86. Department of Public Health, University of Helsinki, 00014 Helsinki, Finland
  87. South Ostrobothnia Central Hospital, 60220 Seinäjoki, Finland
  88. Department of Medicine and Department of Genetics, Harvard Medical School, Boston, Massachusetts 02115, USA

89. Diabetes Unit, Massachusetts General Hospital, Boston, Massachusetts 02114, USA
90. U872 Institut National de la Santé et de la Recherche Médicale, Faculté de Médecine Paris Descartes, 15 rue de l'Ecole de Médecine, 75270 Paris Cedex, France
91. Institute of Health Sciences and Biocenter Oulu, Aapistie 1, FIN-90101, University of Oulu, Finland
92. Center for Statistical Genetics, Department of Biostatistics, University of Michigan, Ann Arbor, Michigan 48109 USA

## REFERENCES

1. Livak KJ, Schmittgen TD. Analysis of relative gene expression data using real-time quantitative PCR and the 2(-Delta Delta C(T)) Method. *Methods*. 2001;25:402-408.
2. Imai Y, Nagai K, Sakuma M, Sakuma H, Nakatsuka H, Satoh H, Minami N, Munakata M, Hashimoto J, Yamagishi T. Ambulatory blood pressure of adults in Ohasama, Japan. *Hypertension*. 1993;22:900-912.
3. Tamaki S, Nakamura Y, Tsujita Y, Nozaki A, Amamoto K, Kadowaki T, Kita Y, Okamura T, Iwai N, Kinoshita M, Ueshima H. Polymorphism of the angiotensin converting enzyme gene and blood pressure in a Japanese general population (the Shigaraki Study). *Hypertens Res*. 2002;25:843-848.
4. Yoshida M, Kita Y, Nakamura Y, Nozaki A, Okayama A, Sugihara H, Kasamatsu T, Hirose K, Kinoshita M, Ueshima H. Incidence of acute myocardial infarction in Takashima, Shiga, Japan. *Circ J*. 2005;69:404-408.
5. Mannami T, Konishi M, Baba S, Nishi N, Terao A. Prevalence of asymptomatic carotid atherosclerotic lesions detected by high-resolution ultrasonography and its relation to cardiovascular risk factors in the general population of a Japanese city: the Suita study. *Stroke*. 1997;28:518-525.
6. Tabara Y, Osawa H, Kawamoto R, Onuma H, Shimizu I, Miki T, Kohara K, Makino H. Replication study of candidate genes associated with type 2 diabetes based on genome-wide screening. *Diabetes*. 2009;58:493-498.
7. Jin JJ, Nakura J, Wu Z, Yamamoto M, Abe M, Tabara Y, Yamamoto Y, Igase M, Kohara K, Miki T. Association of endothelin-1 gene variant with hypertension. *Hypertension*. 2003;41:163-167.
8. Newton-Cheh C, Johnson T, Gateva V, Tobin MD, Bochud M, Coin L, Najjar SS, Zhao JH, Heath SC, Eyheramendy S, Papadakis K, Voight BF, Scott LJ, Zhang F, Farrall M, Tanaka T, Wallace C, Chambers JC, Khaw KT, Nilsson P, van der Harst P, Polidoro S, Grobbee DE, Onland-Moret NC, Bots ML, Wain LV, Elliott KS, Teumer A, Luan J, Lucas G, Kuusisto J, Burton PR, Hadley D, McArdle WL; Wellcome Trust Case Control Consortium, Brown M, Dominiczak A, Newhouse SJ, Samani NJ, Webster J, Zeggini E, Beckmann JS, Bergmann S, Lim N, Song K, Vollenweider P, Waeber G, Waterworth DM, Yuan X, Groop L, Orho-Melander M, Allione A, Di Gregorio A, Guarrera S, Panico S, Ricceri F, Romanazzi V, Sacerdote C, Vineis P, Barroso I, Sandhu MS, Luben RN, Crawford GJ, Jousilahti P, Perola M, Boehnke M, Bonnycastle LL, Collins FS, Jackson AU, Mohlke KL, Stringham HM, Valle TT, Willer CJ, Bergman RN, Morken MA, Döring A, Gieger C, Illig T, Meitinger T, Org E, Pfeufer A, Wichmann HE, Kathiresan S, Marrugat J, O'Donnell CJ, Schwartz SM, Siscovick DS, Subirana I, Freimer NB, Hartikainen AL, McCarthy MI, O'Reilly PF, Peltonen L, Pouta A, de Jong PE, Snieder H, van Gilst WH, Clarke R, Goel A, Hamsten A, Peden JF, Seedorf U, Syvänen AC, Tognoni G, Lakatta EG, Sanna S, Scheet P, Schlessinger D, Scuteri A, Dörr M, Ernst F, Felix SB,

Homuth G, Lorbeer R, Reffelmann T, Rettig R, Völker U, Galan P, Gut IG, Hercberg S, Lathrop GM, Zelenika D, Deloukas P, Soranzo N, Williams FM, Zhai G, Salomaa V, Laakso M, Elosua R, Forouhi NG, Völzke H, Uiterwaal CS, van der Schouw YT, Numans ME, Matullo G, Navis G, Berglund G, Bingham SA, Kooner JS, Connell JM, Bandinelli S, Ferrucci L, Watkins H, Spector TD, Tuomilehto J, Altshuler D, Strachan DP, Laan M, Meneton P, Wareham NJ, Uda M, Jarvelin MR, Mooser V, Melander O, Loos RJ, Elliott P, Abecasis GR, Caulfield M, Munroe PB. Genome-wide association study identifies eight loci associated with blood pressure. *Nat Genet.* 2009;41:666-676.
